# Supplementary material for: Identification of Host Factors for Rift Valley Fever Phlebovirus
Source: MDPI journal article supplement (doi:10.3390/v15112251), 2023-11-13
Supplement: s1 [file s1]

## Supplementary File S2:

### I – Predicted *WDR7* gene sequences

### II - Sanger sequencing

**I. Predicted *WDR7* gene sequences of wild-type and *WDR7* knock-out A549 cells. A, B.** Wild-type A549 cells. **C-F.** *WDR7* knock-out cell line 1. **G-J.** *WDR7* knock-out cell line 2. The sgRNA binding region of exon 2 and exon 17 is highlighted in yellow. The *indels* and mutations are highlighted in red.

#### A) Full nucleotide sequence of *WDR7* gene exon 1-28 in wild-type A549 cells:

ATGGCAGGAAACAGCCTTGTCTACCCATTGTTCTTTGGGGTCGAAAAGCGCCACACAT  
TGCATCTCAGCCGTACTTTTAACAGATGATGGGGCCA**CGATCGTAACAGGATGTCAC**GAC  
GGACAAATATGTCTCTGGGATCTTTCAGTAGAACTGCAAATTAATCCTCGAGCACTGTTG  
TTTGGTCATACAGCATCAATCACTTGTGTCTAAAGCTTGTGCTTCCAGTGACAAACAG  
TATATTGTGAGTGATCTGAAAGTGGAGAGATGTGCCTCTGGGATGTGAGTGATGGCAGA  
TGTATTGAATTTACAAAATTAGCTTGCACACATACTGGCATAACAGTTCTACCAGTTCTCT  
GTTGGGAATCAGCGAGAAGGAAGGCTTTTATGCCACGGACATTACCCTGAAATCCTTGTT  
GTGGATGCTACCAGCCTTGAAGTATTATACTCCTTAGTATCAAAGATATCACCAGACTGG  
ATTAGCTCCATGAGTATTATTCGATCCACCGAACACAAGAGGACACAGTGGTAGCACTC  
TCGGTGACTGGCATCCTGAAGGTCTGGATTGTTACCTCGGAAATAAGTGACATGCAGGAT  
ACTGAGCCAATATTTGAGGAGGAATCCAAACCAATTTATTGTCAGAATTGCCAAAGCATC  
TCTTTTGTGCATTTACACAAAGGTCACCTTTGGTTGTGTGTTCCAAATATTGGAGGGTG  
TTCGATGCCGGAGACTATTCTTGTGTGTTTCAGGTCCAGTGAATAATGGACAGACATGG  
ACCGGGGGGGACTTTGTCTCATCAGATAAAGTCATCATTTGGACAGAAAATGGGCAAAGT  
TATATTTACAACTACCTGCCAGTTGCCTTCCAGCTAGTGATTCAATCCGCAGTGATGTG  
GGGAAGGCAGTTGAAAATTTAATTCCTCCTGTACAACATATCCTCTTGATCGAAAAGAT  
AAAGAGTTGCTAATTTGTCTCCTGTTACTCGGTTCTTCTATGGATGCAGAGAATATTTT  
CATAAACTGTTAATTCAGGGTGATTCTTCTGGAAGGTTGAATATTTGGAACATATCAGAC  
ACAGCTGATAAACAGGGAAGTGAAGAAGGGCTGGCAATGACAACCTTCTATTAGTTTGCA  
GAGGCATTTGATAAACTGAATCCTTGTCTGCTGGAATTATAGATCAGCTGAGTGTGATT  
CCCAATAGTAATGAACCTCTTAAAGTAACTGCAAGTGTGTACATAACCAGCACATGGACGA  
CTTGTTTGTGGTTCGTGAAGATGGAAGCATAGTTATTGTACCTGCCACACAGACGGCCATA  
GTACAGCTGTTGCAAGGGGAACACATGCTCAGAAGAGGTTGGCCACCTCACAGAACTC  
CGTGGTCATCGGAACAAAGTCACATGTTTGCTATATCCTCATCAGGTCTCAGCTCGGTAT  
GATCAAAGATACCTGATATCTGGAGGTGTGGATTTTTCAGTCATAATTTGGGACATATTT  
TCTGGAGAAATGAAACATATCTTCTGTGTTTCATGGTGGTGAGATTACTCAACTTCTAGTT  
CCACCTGAAAACCTGTAGTGCAAGAGTACAGCACTGCATCTGCTCTGTAGCCAGTGACCAC  
TCAGTAGGACTTCTAAGTTTTCGAGAGAGAAAAATGCATAATGTTGGCATCTCGTCACCTT  
TTTCTATTCAAGTAATCAAATGGAGGCCCTTCTGATGATTACCTGGTGGTGGGGTGTTC  
GATGGTTCTGTGTACGTCTGGCAAATGGATACTGGTGCATTGGATCGTTGTGTGATGGGG  
ATAACAGCAGTTGAGATTCTAAACGCTTGTGATGAAGCTGTTCTGCTGCTGTTGATTCA  
CTTAGTCATCCAGCAGTCAACCTAAAACAAGCTATGACGAGACGTAGTCTTGCTGCTCTT  
AAAAATATGGCCCATCATAAGCTACAAACCTTGCAACTAACCTCTTGGCTTCTGAGGCA  
TCTGACAAGGGAAATTTACCTAAATATTCTCATAACTCCCTGATGGTTCAAGCAATAAAG  
ACAAACCTAACAGACCCGGACATACATGTGCTATTCTTTGATGTGGAAGCGTTGATTATT  
CAACTCCTGACTGAAGAAGCCTCTAGGCCGAATACTGCTCTTATTTCCCAGAGAATTG  
CAAAAAGCATCTGGCAGTTCAGACAAAGGGGGCTCTTTTTTAAGTGGAAAACGAGCAGCA  
GTTCTCTTCCAACAAGTGAAGAAACGATCAAAGAGAACATCAAGGAACACCTCCTTGAT  
GATGAAGAGGAGGATGAGGAGATAATGAGGCAGAGAAGGGAAGAAAGTGATCCTGAATAT  
CGGTCCAGCAAATCAAAGCCATTGACCCTATTAGAATATAATTTAACTATGGACACTGCA  
AAGCTGTTTATGTCCTGCCTTCACGCCTGGGGTTTGAATGAAGTACTGGATGAAGTTTGC  
CTGGATCGCCTTGGAATGCTGAAACCCCACTGCACCGTATCGTTTGGCCTCTTGTCAGA

GGAGGCCATATGTCACTGATGCTGCCGGGTTATAATCAGCCTGCTTGTAAGTGTACAT  
 GGGAAACAGAAAGTAGGAAGGAAGCTGCCAGCGTCTGAGGGAGTAGGAAAGGGAACCTAC  
 GGAGTGTCCCGTGCCGTCACCACACAGCATCTCCTGTCTATCATTCTTTGGCAAATACT  
 TTAATGAGTATGACCAATGCAACTTTTATTGGTGATCATATGAAGAAGGGTCCTACCAGG  
 CCACCTAGACCAAGCACCCAGACCTTTCTAAGGCAAGGGGTTCCCTCCAACCTCCAGT  
 AATATTGTGCAAGGACAGATTAAACAAGTTGCTGCACCTGTCGTTTCCGCTCGGTCTGAT  
 GCTGATCACTCTGGCTCTGACCCTCCTTCTGCTCCTGCTTTACATACCTGTTTCTTAGTA  
 AATGAAGGTTGGAGTCAGTTAGCTGCTATGCACTGTGTTATGCTGCCAGACCTACTGGGA  
 TTGGATAAATTTAGGCCTCCCCTTCTGGAGATGCTGGCCCGAAGATGGCAAGATCGATGC  
 TTGGAGGTGAGAGAAGCCGCGCAGGCCCTGCTTCTGGCGGAAGTGAAGAATTGAGCAG  
 GCAGGCAGGAAGGAAGCCATTGATGCCTGGGCTCCTTACTTACCTCAGTACATAGACCAC  
 GTCATATCACCTGGAGTCACATCAGAAGCCGCGCAGACTATCACCACGGCTCCTGATGCC  
 TCAGGGCCTGAAGCAAAAGTCCAGGAGGAAGAGCATGACCTTGTGACGATGACATCACC  
 ACTGGTTGCTTATCAAGTGTCCACAAATGAAAAAATTTCTACATCTTACGAGGAAAGA  
 CGGAAGCAAGCTACCGCTATTGTTTTACTTGGAGTAATAGGAGCTGAATTTGGTGCTGAA  
 ATTTGAACCTCTAAACTATTGACCAGACTCTGAAGCTCTAGCCAAATTCCTGAGGGATTG  
 GGGTTGACTAGTGGTGGATCCAACTACTCGCTGGCCAGACATACTTGCAAGGCCTGACG  
 TTTCTTCTGTACTAGCCTCCAAGCCCCAACTTCCTCCACACAGCACTATCCGAAGAACA  
 GCCATTGATCTGATTGGACGTGGGTTCACTGTTTGGGAGCCTTACATGGATGTGTCCGCT  
 GTTCTGATGGGGCTTCTCGAACTTTGTGCCGATGCCGAGAAACAAGTGGCAACATCACA  
 ATGGGGTTGCCTCTGAGCCCAGCAGCTGACTCGGCCCGCTCTGCGAGGCATGCCCTCTCG  
 CTCATTGCCACCGCCAGACCACCCGCTTCATCACCACCATAGCCAAAGAGGTACACAGA  
 CATA CGGCTCTTGCAGCAAATACCAATCACAGCAGAATATGCACACAACAAGTCTTGCA  
 CGAGCTAAAGGGGAAATTTTGGAGTCAATTGAAATTCTTATTGAAAAGATGCCACAGAT  
 GTTGTGGATCTTCTCGTGGAGGTTATGGACATCATTATGTACTGCCTGAAGGATCTTTA  
 GTTAAAAAGAAAGGTCTTCAAGAATGTTTCCCAGCCATCTGCAGGTTCTACATGGTCAGC  
 TATTATGAGCGGAATCACAGAATAGCAGTTGGAGCTCGCCATGGTTCAGTGGCCCTGTAC  
 GACATCCGGACTGGAAAATGTCAGACAATCCATGGACACAAGGGACCAATCACTGCAGTG  
 GCTTTTGCTCCTGATGGAAGATATCTTGCCACCTACTCAAACACTGACAGCCACATTTCT  
 TTTTGGCAGATGAACACGTCAGTCTGTTGGGAAGCATCGGCATGCTGAACTCGGCACCTCAG  
 CTGCGCTGCATTAACCTACCAGGTGCCCCCTGTGCAGCCCGCGTCCCCGGCTCCAC  
 AATGCCCTCAAGCTGGCCCGGCTCATCTGGACTTCCAACCGCAACGTCATCCTCATGGCC  
 CATGACGGGAAGGAGCACCGCTTCATGGTCTAA

**B) Full amino acid sequence of the WDR7 protein in wild-type A549 cells: 1490 amino acid**  
 MAGNSLVLPVLWGRKAPTHCISAVLLTDDGATIVTGCHDQICLWDLVELQINPRALL  
 FGHTASITCLSKACASSDKQYIVSASESGEMCLWDVSDGRGIEFTKLACTHTGIQFYQFS  
 VGNQREGRLCHGHYPEILVVDATSLVLYSLVSKISPDWISSMSIIRSHRTQEDTVVAL  
 SVTGILKVWIVTSEISDMQDTEPIFEEESKPIYQNCQISFCAFTQSRLLVVCISKYWRV  
 FDAGDYSLLCSGPSENGQWTWGDFVSSDKVIIWTENGQSYIYKLPASCLPASDSFRSDV  
 GKAVENLIPPVQHILLDRDKELLICPPVTRFFYGCREYFHKLLIQDSSGRLNIWNISD  
 TADKQGSEEGLAMTTISLQEAFLDKLNPCAGIIDQLSVIPNSNEPLKVTASVYIPAHGR  
 LVCGREDGSIVIVPATQTAIVQLLQGEHMLRRGWPPHRTLGRHRNKVTCLLYPHQVSARY  
 DQRYLISGGVDFSVIIWDIFSGEMKHIFCVHGGIEITQLLVPPENC SARVQHCICSVASDH  
 SVGLLSLREKKCIMLASRHLFPQVIKWRPSDDYLVVGCSDGSVYVWQMDTGALDRCVMG  
 ITAVEILNACDEAVPAAVDSLSPAVNLKQAMTRRSLAALKNMAHHKLQTLATNLLASEA  
 SDKGNLPKYSHNSLMVQAIKTNLTDPIHVLFFDVEALIIQLL TEEASRPNTALISPENL  
 QKASGSSDKGGSFLTGKRAAVLFQQVKETIKENIKEHLLDDEEEDDEIMRQRREESDPEY  
 RSSKSKPLTLLEYNL TMDTAKLFMSCLHAWGLNEVLDEVCLDRLGMLKPHCTVSFGLLSR  
 GGHMSLMLPGYNQPACKLSHGKTEVGRKLPASEGVGKGTYGVSRAVTTQHLLSIISLANT  
 LMSMTNATFIGDHMKKGTPRPPRSTPDLSKARGSPPTSSNIVQGQIKQVAAPVVSARS  
 ADHSGSDPPSAPALHTCFLVNEGWSQLAAMHCVMLPDLGLDKFRPPLLEMLARRWQDRC  
 LEVREAAQALLLAELRRIEQAGRKEAIDAWAPYLPQYIDHVISPGVTSEAAQTITTAPDA  
 SGPEAKVQEEEHDLVDDDITTGCLSSVPQMKKISTSYEERRKQATAIVLLGVIGAEFGAE  
 IEPKLLTRPRSSSQIPEGFGLTSGGSNYSLARHTCKALTFLLLQPPSPKLPHPSTIRRT  
 AIDLIGRGFTVWEPYMDVSAVLMGLLELCADA EKQLANITMGLPLSPAADSARSARHALS

LIATARPPAFITTIAKEVHRHTALAANTQSQQNMHTTTLARAKGEILRVIEILIEKMPTD  
VVDLLVEVMDIIMYCLEGLVKKKGLQECFPAICRFYMVSYERNHRIAVGARHGSVALY  
DIRTGKCQTIHGHKGPIAVAFAPDGRYLATYSNTDSHISFWQMNTSLLGSIGMLNSAPQ  
LRCIKTYQVPPVQPASPGSHNALKLARLIWTSNRNVILMAHDGKEHRFMV\*

**C) WDR7 KO cell line 1 (sgRNA 1): Indel 'A' insertion**

ATGGCAGGAAACAGCCTTGTTCTACCCATTGTTCTTTGGGGTCGAAAAGCGCCACACAT  
TGCATCTCAGCCGTACTTTTAACAGATGATGGGGCCA**CGAATCGTAAACAGGATGTCAC**GAC  
GGACAAATATGTCTCTGGGATCTTTAGTAGAACTGCAAATTAATCCTCGAGCACTGTTG  
TTTGGTCATACAGCATCAATCACTTGTTTGTCTAAAGCTTGTTGCTTCCAGTGACAAACAG  
TATATTGTGAGTGATCTGAAAAGTGGAGAGATGTGCCTCTGGGATGTGAGTGATGGCAGA  
TGTATTGAATTTACAAAATTAGCTTGCACACATACTGGCATAACAGTTCTACCAGTTCTCT  
GTTGGGAATCAGCGAGAAGGAAGGCTTTATGCCACGGACATTACCCTGAAATCCTTGTT  
GTGGATGTACACGCTTGAAGTATTATACTCCTTAGTATCAAAGATATCACCAGACTGG  
ATTAGTCCATGAGTATTATTTCGATCCCACCGAACACAAAGAGGACACAGTGGTAGCACTC  
TCGGTGACTGGCATCCTGAAGGTCTGGATTGTTACCTCGGAAATAAGTGACATGCAGGAT  
ACTGAGCCAATATTTGAGGAGGAATCCAAACCAATTTATTGTCAGAATTGCCAAAGCATC  
TCTTTTTGTGCATTTACACAAAGGTCACTTTTGGTTGTGTGTTCCAAATATTGGAGGGTG  
TTCGATGCCGGAGACTATTCCTTGTTGTGTTACGGTCTAGTGAAAATGGACAGACATGG  
ACCGGGGGGGACTTTGTCTCATCAGATAAAGTCATCATTTGGACAGAAAATGGGCAAAGT  
TATATTTACAACTACCTGCCAGTTGCCTTCAGCTAGTGATTCAATCCGCAGTGATGTG  
GGGAAGGCAGTTGAAAATTTAATTCCTCCTGTACAACATATCCTCTTGGATCGAAAAGAT  
AAAGAGTTGCTAATTTGTCTCCTGTTACTCGGTTCTTCTATGGATGCAGAGAATATTTT  
CATAAACTGTTAATTCAGGGTGATTCTTCTGGAAGGTTGAATATTTGGAACATATCAGAC  
ACAGCTGATAAACAGGGAAGTGAAGAAGGGCTGGCAATGACAACCTTCTATTAGTTTGCAA  
GAGGCATTTGATAAACTGAATCCTTGCTGCTGGAATTATAGATCAGCTGAGTGTGATT  
CCCAATAGTAATGAACCTCTTAAAGTAACTGCAAGTGTGTACATACCAGCACATGGACGA  
CTTGTTTGTGGTTCGTGAAGATGGAAGCATAGTTATTGTACCTGCCACACAGACGGCCATA  
GTACAGCTGTTGCAAGGGGAACACATGCTCAGAAGAGGTTGGCCACCTCACAGAACACTC  
CGTGGTCATCGGAACAAAGTCACATGTTTGCTATATCCTCATCAGGTCTCAGCTCGGTAT  
GATCAAAGATACCTGATATCTGGAGGTGTGGATTTTTTCAGTCATAATTTGGGACATATTT  
TCTGGAGAAATGAAACATATCTTCTGTGTTTCATGGTGGTGAGATTACTCAACTTCTAGTT  
CCACCTGAAAACCTGTAGTGCAAGAGTACAGCACTGCATCTGCTCTGTAGCCAGTGACCAC  
TCAGTAGGACTTCTAAGTTTTCGAGAGAGAAAAATGCATAATGTTGGCATCTCGTCACCTT  
TTTCTATTCAAGTAATCAAATGGAGGCCCTTCTGATGATTACCTGGTGGTGGGGTGTTCA  
GATGGTTCTGTGTACGTCTGGCAAATGGATACTGGTGCATTGGATCGTTGTGTGATGGGG  
ATAACAGCAGTTGAGATTCTAAACGCTTGTGATGAAGCTGTTTCTGCTGCTGTTGATTCA  
CTTAGTCATCCAGCAGTCAACCTAAAACAAGCTATGACGAGACGTAGTCTTGCTGCTCTT  
AAAAATATGGCCCATCATAAGCTACAAACCTTGCAACTAACCTCTTGGCTTCTGAGGCA  
TCTGACAAGGGAAATTTACCTAAATATTCTATAACTCCCTGATGGTTCAAGCAATAAAG  
ACAAACCTAACAGACCCGGACATACATGTGCTATTCTTTGATGTGGAAGCGTTGATTATT  
CAACTCCTGACTGAAGAAGCCTCTAGGCCGAATACTGCTCTTATTTCCCCAGAGAATTTG  
CAAAAAGCATCTGGCAGTTCAGACAAAGGGGGCTCTTTTTTAACTGGAAAACGAGCAGCA  
GTTCTCTTCCAACAAGTGAAAGAAACGATCAAAGAGAACATCAAGGAACACCTCCTTGAT  
GATGAAGAGGAGGATGAGGAGATAATGAGGCAGAGAAGGGAAGAAAGTGATCCTGAATAT  
CGGTCCAGCAAATCAAAGCCATTGACCCTATTAGAATATAATTTAACTATGGCACTGCA  
AAGCTGTTTATGTCCTGCCTTACGCCTGGGGTTTGAATGAAGTACTGGATGAAGTTTGC  
CTGGATCGCCTTGGAATGCTGAAACCCCACTGCACCGTATCGTTTGGCCTCTTGTCAGA  
GGAGGCCATATGTCACTGATGCTGCCGGGTTATAATCAGCCTGCTTGTAACCTGTCACAT  
GGGAAAACAGAAGTAGGAAGGAAGCTGCCAGCGTCTGAGGGAGTAGGAAAGGGAACCTAC  
GGAGTGTCCCGTGCCGTCACCACACAGCATCTCCTGTCTATCATTTCTTTGGCAAATACT  
TTAATGAGTATGACCAATGCAACTTTTATTGGTGATCATATGAAGAAGGGTCCTACCAGG  
CCACCTAGACCAAGCACCCAGACCTTTCTAAGGCAAGGGGTTCCCTCCAACCTCCAGT  
AATATTGTGCAAGGACAGATTAAACAAGTTGCTGCACCTGTGTTTTCCGCTCGGTCTGAT  
GCTGATCACTCTGGCTCTGACCCTCCTTCTGCTCCTGCTTTACATACCTGTTTCTTAGTA

AATGAAGGTTGGAGTCAGTTAGCTGCTATGCACTGTGTTATGCTGCCAGACCTACTGGGA  
 TTGGATAAATTTAGGCCTCCCCTTCTGGAGATGCTGGCCCGAAGATGGCAAGATCGATGC  
 TTGGAGGTGAGAGAAGCCGCGCAGGCCCTGCTTCTGGCGGAAGTGAAGAATTGAGCAG  
 GCAGGCAGGAAGGAAGCCATTGATGCCTGGGCTCCTTACTTACCTCAGTACATAGACCAC  
 GTCATATCACCTGGAGTCACATCAGAAGCCGCGCAGACTATCACCACGGCTCCTGATGCC  
 TCAGGGCCTGAAGCAAAAGTCCAGGAGGAAGAGCATGACCTTGTTGACGATGACATCACC  
 ACTGGTTGCTTATCAAGTGTCCCAAAATGAAAAAATTTCTACATCTTACGAGGAAAGA  
 CGGAAGCAAGCTACCGCTATTGTTTTACTTGGAGTAATAGGAGCTGAATTTGGTGCTGAA  
 ATTGAACCTCCTAAACTATTGACCAGACCTCGAAGCTCTAGCCAAATTCCTGAGGGATT  
 GGGTTGACTAGTGGTGGATCCAATACTCGCTGGCCAGACATACTTGCAAGGCACTGACG  
 TTTCTTCTGCTACAGCCTCCAAGCCCCAACTTCCTCCACACAGCACTATCCGAAGAACA  
 GCCATTGATCTGATTGGACGTGGGTTCACTGTTTGGGAGCCTTACATGGATGTGTCCGCT  
 GTTCTGATGGGGCTTCTCGAACTTTGTGCCGATGCCGAGAAACAACTTGCCAACATCACA  
 ATGGGGTTGCCTCTGAGCCCAGCAGCTGACTCGGCCCGCTCTGCGAGGCATGCCCTCTCG  
 CTCATTGCCACCGCCAGACCACCCGCTTCATCACCACCATAGCCAAAGAGGTACACAGA  
 CATACGGCTCTTGCAGCAAAATACCCAATCACAGCAGAATATGCACACAACAACCTTTGCA  
 CGAGCTAAAGGGGAAATTTTGAGAGTCATTGAAATTCTTATTGAAAAGATGCCACAGAT  
 GTTGTGGATCTTCTCGTGGAGGTTATGGACATCATTATGTACTGCCTGAAGGATCTTTA  
 GTTAAAAAGAAAGGTCCTTCAAGAATGTTTCCCAGCCATCTGCAGGTTCTACATGGTCAGC  
 TATTATGAGCGGAATCACAGAATAGCAGTTGGAGCTCGCCATGGTTCAGTGGCCCTGTAC  
 GACATCCGGACTGGAAAATGTCAGACAATCCATGGACACAAGGGACCAATCACTGCAGTG  
 GCTTTTGCTCCTGATGGAAGATATCTTGCCACCTACTCAAACACTGACAGCCACATTTCT  
 TTTTGGCAGATGAACACGTCCTGCTGGGAAGCATCGGCATGCTGAACTCGGCACCTCAG  
 CTGCGCTGCATTAACCTACCAGGTGCCCCCTGTGCAGCCCGCTCCCCGGCTCCCAC  
 AATGCCCTCAAGCTGGCCCGGCTCATCTGGACTTCCAACCGCAACGTCATCCTCATGGCC  
 CATGACGGGAAGGAGCACCGCTTCATGGTCTAA

**D) Full amino acid sequence: WDR7 protein-frame shift mutation (stop codon) early termination:**  
 MAGNSLVLPVLWGRKAPTHCISAVLLTDDGATNRNRM~~SRRTNMSLGSFSRTAN~~\*

**E) WDR7 KO cell line 1 (sgRNA1): Indel 'T' deletion**

ATGGCAGGAAACAGCCTTGTTCTACCCATTGTTCTTTGGGGTCGAAAAGCGCCACACAT  
 TGCATCTCAGCCGTACTTTTAAACAGATGATGGGGCCA~~CGA~~CGTAACAGGATGTCACGAC  
 GGACAAATATGTCTCTGGGATCTTTAGTAGAACTGCAAATTAATCCTCGAGCACTGTTG  
 TTTGGTCATACAGCATCAATCACTTGTTTGTCTAAAGCTTGTGCTTCCAGTGACAAACAG  
 TATATTGTGAGTGCATCTGAAAGTGGAGAGATGTGCCTCTGGGATGTGAGTGATGGCAGA  
 TGTATTGAATTTACAAAATTAGCTTGCACACATACTGGCATAACAGTTCTACCAGTTCTCT  
 GTTGGGAATCAGCGAGAAGGAAGGCTTTATGCCACGGACATTACCCTGAAATCCTTGTT  
 GTGGATGCTACCAGCCTTGAAGTATTATACTCCTTAGTATCAAAGATATCACCAGACTGG  
 ATTAGCTCCATGAGTATTATTCGATCCCACCGAACACAAGAGGACACAGTGGTAGCACTC  
 TCGGTGACTGGCATCCTGAAGGTCTGGATTGTTACCTCGGAAATAAGTGACATGCAGGAT  
 ACTGAGCCAATATTTGAGGAGGAATCCAAACCAATTTATTGTGAGAATTGCCAAAGCATC  
 TCTTTTGTGCATTTACACAAAGGTCACTTTTGGTTGTGTGTTCCAAATATTGGAGGGTG  
 TTCGATGCCGGAGACTATTCCTTGTTGTGTTCAAGTCTAGTGAAAATGGACAGACATGG  
 ACCGGGGGGGACTTTGTCTCATCAGATAAAGTCATCATTTGGACAGAAAATGGGCAAAGT  
 TATATTTACAACTACCTGCCAGTTGCCTTCAGCTAGTGATTCAATCCGCAGTGATGTG  
 GGGAAGGCAGTTGAAAATTTAATTCCTCCTGTACAACATATCCTCTTGGATCGAAAAGAT  
 AAAGAGTTGCTAATTTGTCTCCTGTTACTCGGTTCTTCTATGGATGCAGAGAATATTTT  
 CATAAACTGTTAATTCAGGGTGATTCTTCTGGAAGGTTGAATATTTGGAACATATCAGAC  
 ACAGCTGATAAACAGGGAAGTGAAGAAGGGCTGGCAATGACAACCTTCTATTAGTTTGCAA  
 GAGGCATTTGATAAACTGAATCCTTGCTGCTGGAATTATAGATCAGCTGAGTGTGATT  
 CCCAATAGTAATGAACCTCTTAAAGTAACTGCAAGTGTGTACATACCAGCACATGGACGA  
 CTTGTTTGTGGTCGTGAAGATGGAAGCATAGTTATTGTACCTGCCACACAGACGGCCATA  
 GTACAGCTGTTGCAAGGGGAACACATGCTCAGAAGAGGTTGGCCACCTCACAGAACTC

CGTGGTCATCGGAACAAAGTCACATGTTTGCTATATCCTCATCAGGTCTCAGCTCGGTAT  
 GATCAAAGATACCTGATATCTGGAGGTGTGGATTTTTTCAGTCATAATTTGGGACATATTT  
 TCTGGAGAAATGAAACATATCTTCTGTGTTTCATGGTGGTGAGATTACTCAACTTCTAGTT  
 CCACCTGAAAAGTGTAGTGCAAGAGTACAGCACTGCATCTGCTCTGTAGCCAGTGACCAC  
 TCAGTAGGACTTCTAAGTTTTCGAGAGAAAAAATGCATAATGTTGGCATCTCGTCACCTT  
 TTTCTATTCAGTAATCAAATGGAGGCCTTCTGATGATTACCTGGTGGTGGGGTGTTC  
 GATGGTTCTGTGTACGTCTGGCAAATGGATACTGGTGCATTGGATCGTTGTGTGATGGGG  
 ATAACAGCAGTTGAGATTCTAAACGCTTGTGATGAAGCTGTTCTGCTGCTGTTGATTCA  
 CTTAGTCATCCAGCAGTCAACCTAAAAACAAGCTATGACGAGACGTAGTCTTGCTGCTCTT  
 AAAAATATGGCCCATCATAAGCTACAAACCTTGCAACTAACCTCTTGCTTCTGAGGCA  
 TCTGACAAGGGAAATTTACCTAAATATTCTCATAACTCCCTGATGGTTCAAGCAATAAG  
 ACAAACCTAACAGACCCGGACATACATGTGCTATTCTTTGATGTGGAAGCGTTGATTATT  
 CAACTCCTGACTGAAGAAGCCTCTAGGCCGAATACTGCTCTTATTTCCCAGAGAATTTG  
 CAAAAAGCATCTGGCAGTTTCAGACAAAGGGGGCTCTTTTTTAACTGGAAAACGAGCAGCA  
 GTTCTCTTCCAACAAGTGAAAGAAACGATCAAAGAGAACATCAAGGAACACCTCCTTGAT  
 GATGAAGAGGAGGATGAGGAGATAATGAGGCAGAGAAGGAAGAAAGTGATCCTGAATAT  
 CGGTCCAGCAAATCAAAGCCATTGACCCTATTAGAATATAATTTAACTATGGACACTGCA  
 AAGCTGTTTATGTCCTGCCTTCACGCCTGGGGTTTGAATGAAGTACTGGATGAAGTTTGC  
 CTGGATCGCCTTGGAATGCTGAAACCCCACTGCACCGTATCGTTTGGCCTCTTGTCAGA  
 GGAGGCCATATGTCACTGATGCTGCCGGGTTATAATCAGCCTGCTTGTAACCTGTCACAT  
 GGGAAAACAGAAAGTAGGAAGGAAGCTGCCAGCGTCTGAGGGAGTAGGAAAGGGAACCTAC  
 GGAGTGTCCCGTGCCGTCACCACACAGCATCTCCTGTCTATCATTTCTTTGGCAAATACT  
 TTAATGAGTATGACCAATGCAACTTTTATTGGTGATCATATGAAGAAGGGTCCTACCAGG  
 CCACCTAGACCAAGCACCCAGACCTTTCTAAGGCAAGGGGTTCCCCTCCAACCTCCAGT  
 AATATTGTGCAAGGACAGATTAACAAGTTGCTGCACCTGTCGTTTCCGCTCGGTCTGAT  
 GCTGATCACTCTGGCTCTGACCCTCCTTCTGCTCCTGCTTTACATACCTGTTTCTTAGTA  
 AATGAAGGTTGGAGTCAGTTAGCTGCTATGCACTGTGTTATGCTGCCAGACCTACTGGGA  
 TTGGATAAATTTAGGCCTCCCCTTCTGGAGATGCTGGCCCCG**AAGATGGCAAGATCGATGC**  
**T**TGGAGGTGAGAGAAGCCGCGCAGGCCCTGCTTCTGGCGGAAGTGAAGAATTGAGCAG  
 GCAGGCAGGAAGGAAGCCATTGATGCCTGGGCTCCTTACTTACCTCAGTACATAGACCAC  
 GTCATATCACCTGGAGTCACATCAGAAGCCGCGCAGACTATCACACGGCTCCTGATGCC  
 TCAGGGCCTGAAGCAAAAGTCCAGGAGGAAGAGCATGACCTTGTTGACGATGACATCACC  
 ACTGGTTGCTTATCAAGTGTCCACAAATGAAAAAATTTCTACATCTTACGAGGAAAGA  
 CGGAAGCAAGCTACCGCTATTGTTTTACTTGGAGTAATAGGAGCTGAATTTGGTGCTGAA  
 ATTGAACCTCCTAAACTATTGACCAGACCTCGAAGCTCTAGCCAAATTCCTGAGGGATT  
 GGGTTGACTAGTGGTGGATCCAACTACTCGCTGGCCAGACATACTTGCAAGGCACTGACG  
 TTTCTTCTGCTACAGCCTCCAAGCCCCAACTTCTCCACACAGCACTATCCGAAGAACA  
 GCCATTGATCTGATTGGACGTGGGTTCACTGTTTGGGAGCCTTACATGGATGTGTCCGCT  
 GTTCTGATGGGGCTTCTCGAACTTTGTGCCGATGCCGAGAAACAACCTTGCCAACATCACA  
 ATGGGGTTGCCTCTGAGCCCAGCAGCTGACTCGGCCCGCTCTGCGAGGCATGCCCTCTCG  
 CTCATTGCCACCGCCAGACCACCCGCTTCATCACCACCATAGCCAAAGAGGTACACAGA  
 CATACGGCTCTTGACAGCAAATACCCAATCACAGCAGAATATGCACACAACAACCTTTGCA  
 CGAGCTAAAGGGGAAATTTTGAGAGTCATTGAAATTCTTATTGAAAAGATGCCACAGAT  
 GTTGTGGATCTTCTCGTGGAGGTTATGGACATCATTATGTACTGCCTTGAAGGATCTTTA  
 GTTAAAAAGAAAGGTCTTCAAGAATGTTTCCCAGCCATCTGCAGGTTCTACATGGTCAGC  
 TATTATGAGCGGAATCACAGAATAGCAGTTGGAGCTCGCCATGGTTCAAGTGGCCCTGTAC  
 GACATCCGGACTGGAAAATGTCAGACAATCCATGGACACAAGGGACCAATCACTGCAGTG  
 GCTTTTGCTCCTGATGGAAGATATCTTGCCACCTACTCAAACACTGACAGCCACATTTCT  
 TTTTGGCAGATGAACACGTCAGTCTGTTGGGAAGCATCGGCATGCTGAACTCGGCACCTCAG  
 CTGCGCTGCATTAACCTACCAGGTGCCCCCTGTGCAGCCCGCGTCCCCCGGCTCCCAC  
 AATGCCCTCAAGCTGGCCCGGCTCATCTGGACTTCCAACCGCAACGTCATCCTCATGGCC  
 CATGACGGGAAGGAGCACCGCTTCATGGTCTAA

**F) Amino acid sequence: WDR7 protein (stop codon) early termination**

MAGNSLVLPVWGRKAPTHCISAVLLTDDGAT**T**\*

**G) WDR7 KO cell line 2 (sgRNA 5): Indel 'T' insertion**

ATGGCAGGAAACAGCCTTGTTCTACCCATTGTTCTTTGGGGTCGAAAAGCGCCACACATTGCATCTCA  
GCCGTACTTTTAAACAGATGATGGGGCCA**CGATCGTAACAGGATGTCAC**GACGGACAAATATGTCTCTG  
GGATCTTTCAGTAGAACTGCAAATTAATCCTCGAGCACTGTTGTTTGGTCATACAGCATCAATCACTTG  
TTTGTCTAAAGCTTGTGCTTCCAGTGACAAACAGTATATTGTGAGTGCATCTGAAAGTGGAGAGATGT  
GCCTCTGGGATGTGAGTGATGGCAGATGTATTGAATTTACAAAATTAGCTTGACACATACTGGCATA  
CAGTTCCTACCAGTTCCTCTGTTGGGAATCAGCGAGAAGGAAGGCTTTTATGCCACGGACATTACCCTGA  
AATCCTTGTTGTGGATGCTACCAGCCTTGAAGTATTATACTCCTTAGTATCAAAGATATCACCAGACTG  
GATTAGCTCCATGAGTATTATTCGATCCCACCGAACACAAGAGGACACAGTGGTAGCACTCTCGGTGA  
CTGGCATCCTGAAGGTCTGGATTGTTACCTCGGAAATAAGTGACATGCAGGATACTGAGCCAATATTT  
GAGGAGGAATCCAAACCAATTTATTGTGAGAATTGCCAAAGCATCTCTTTTTGTGCATTTACACAAAG  
GTCATTTTTGGTTGTGTGTTCCAAATATTGGAGGGTGTTCGATGCCGGAGACTATTCCTTGTTGTGTTT  
AGGTCCTAGTGAAAATGGACAGACATGGACCGGGGGGGGACTTTGTCTCATCAGATAAAGTCATCATT  
GGACAGAAAATGGGCAAAGTTATATTTACAAACTACCTGCCAGTTGCCTTCCAGCTAGTGATTCATT  
CGCAGTGATGTGGGGAAGGCAGTTGAAAATTTAATTCCTCTGTACAACATATCCTCTTGATCGAAA  
AGATAAAGAGTTGCTAATTTGTCCTCCTGTTACTCGGTTCTCTATGGATGCAGAGAATATTTCCATAA  
ACTGTTAATTCAGGGTGATTCTTCTGGAAGGTTGAATATTTGGAACATATCAGACACAGCTGATAAAC  
AGGGAAGTGAAGAAGGGCTGGCAATGACAACTTCTATTAGTTTGCAAGAGGCATTTGATAAACTGAAT  
CCTTGCTCCTGCTGGAATTATAGATCAGCTGAGTGTGATTCCCAATAGTAATGAACCTCTTAAAGTAACT  
GCAAGTGTGTACATACCAGCACATGGACGACTTGTTTGTGGTCGTGAAGATGGAAGCATAGTTATTGT  
ACCTGCCACACAGACGGCCATAGTACAGCTGTTGCAAGGGGAACACATGCTCAGAAGAGGTTGGCCA  
CCTCACAGAACTCCGTGGTCATCGGAACAAAGTCACATGTTTGCTATATCCTCATCAGGTCTCAGCT  
CGGTATGATCAAAGATACCTGATATCTGGAGGTGTGGATTTTTCAGTCATAATTTGGGACATATTTTCT  
GGAGAAATGAAACATATCTTCTGTGTTTATGGTGGTGAGTACTCAACTTCTAGTTCCACCTGAAAAC  
TGTAAGTGAAGAGTACAGCACTGCATCTGCTCTGTAGCCAGTGACCACTCAGTAGGACTTCTAAGTTT  
GCGAGAGAAAAAATGCATAATGTTGGCATCTCGTCACCTTTTTCTATTCAAGTAATCAAATGGAGGC  
CTTCTGATGATTACCTGGTGGTGGGGTGTTCAGATGGTCTGTGTACGTCTGGCAAATGGATACTGGTG  
CATTGGATCGTTGTGTGATGGGGATAACAGCAGTTGAGATTCTAAACGCTTGTGATGAAGCTGTTCT  
GCTGCTGTTGATTCACTTAGTCATCCAGCAGTCAACCTAAAACAAGCTATGACGAGACGTAGTCTTGCT  
GCTCTTAAAAATATGGCCATCATAAGCTACAAACCCTTGCAACTAACCTCTTGGCTTCTGAGGCATCT  
GACAAGGGAAATTTACCTAAATATTCTCATAACTCCCTGATGGTTCAAGCAATAAAGACAAACCTAAC  
AGACCCGGACATACATGTGCTATTCTTTGATGTGGAAGCGTTGATTATTCAACTCCTGACTGAAGAAG  
CCTCTAGGCCGAATACTGCTCTTATTTCCCAGAGAATTTGCAAAAAGCATCTGGCAGTTCAGACAAA  
GGGGGCTCTTTTTTAACTGGAAAACGAGCAGCAGTTCTCTTCCAACAAGTGAAAGAAACGATCAAAGA  
GAACATCAAGGAACACCTCCTTGATGATGAAGAGGAGGATGAGGAGATAATGAGGCAGAGAAGGGA  
AGAAAGTGATCCTGAATATCGGTCCAGCAAATCAAAGCCATTGACCCTATTAGAATATAATTTAACTA  
TGGACACTGCAAAGCTGTTTATGTCCTGCCTTCACGCCTGGGGTTGAATGAAGTACTGGATGAAGTTT  
GCCTGGATCGCCTTGAATGCTGAAACCCCACTGCACCGTATCGTTTGGCCTCTTGTCAAGAGGAGGC  
CATATGTCATGATGCTGCCGGGTTATAATCAGCCTGCTTGTAACCTGTCACATGGGAAAACAGAAGT  
AGGAAGGAAGCTGCCAGCGTCTGAGGGAGTAGGAAAGGGAACCTTACGGAGTGTCCCGTGCCGTCACC  
ACACAGCATCTCCTGTCTATCATTCTTTGGCAAATACCTTTAATGAGTATGACCAATGCAACTTTTATT  
GGTGATCATATGAAGAAGGGTCTTACCAGGCCACCTAGACCAAGCACCCAGACCTTTCTAAGGCAAG  
GGGTTCCCTCCAACCTCCAGTAATATTGTGCAAGGACAGATTAAACAAGTTGCTGCACCTGTCGTTTCT  
CGCTCGGTCTGATGCTGATCACTCTGGCTCTGACCCTCCTTCTGCTCCTGCTTTACATACCTGTTTCTTA  
GTAAATGAAGGTTGGAGTCAGTTAGCTGCTATGCACTGTGTTATGCTGCCAGACCTACTGGGATTGGA  
TAAATTTAGGCCTCCCCTTCTGGAGATGCTGGCCCG**AAGATTGGCAAGATCGATGCT**TGGAGGTGAGA  
GAAGCCGCGCAGGCCCTGCTTCTGGCGGAAGTGAAGAATTGAGCAGGCAGGCAGGAAGGAAGCCA  
TTGATGCCTGGGCTCCTTACTTACCTCAGTACATAGACCACGTCATATCACCTGGAGTCACATCAGAAG  
CCGCGCAGACTATCACCACGGCTCCTGATGCCTCAGGGCCTGAAGCAAAAGTCCAGGAGGAAGAGCA  
TGACCTTGTTGACGATGACATCACCCTGTTGCTTATCAAGTGTCCACAAATGAAAAAATTTCTAC  
ATCTTACGAGGAAAGACGGAAGCAAGCTACCGCTATTGTTTTACTTGGAGTAATAGGAGCTGAATTTG  
GTGCTGAAATTGAACCTCCTAACTATTGACCAGACCTCGAAGCTCTAGCCAAATTCCTGAGGGATTCT  
GGGTTGACTAGTGGTGGATCCAATACTCGCTGGCCAGACATACTTGCAAGGCACTGACGTTTCTTCTG  
CTACAGCCTCCAAGCCCCAACTTCTCCACACAGCACTATCCGAAGAACAGCCATTGATCTGATTGG  
ACGTGGGTTCACTGTTTGGGAGCCTTACATGGATGTGTCCGCTGTTCTGATGGGGCTTCTCGAACTTTG

TGCCGATGCCGAGAAACAACCTTGCCAACATCACAATGGGGTTGCCTCTGAGCCCAGCAGCTGACTCGG  
CCCGCTCTGCGAGGCATGCCCTCTCGCTCATTGCCACCGCCAGACCACCCGCCTTCATCACCACCATAG  
CCAAAGAGGTACACAGACATACGGCTCTTGCAGCAAATACCCAATCACAGCAGAATATGCACACAAC  
AACTCTTGACGAGCTAAAGGGGAAATTTTGAGAGTCATTGAAATTCCTATTGAAAAGATGCCCACAG  
ATGTTGTGGATCTTCTCGTGGAGGTTATGGACATCATTATGTACTGCCTTGAAGGATCTTTAGTTAAAA  
AGAAAGGTCTTCAAGAATGTTTCCCAGCCATCTGCAGGTTCTACATGGTCAGCTATTATGAGCGGAAT  
CACAGAATAGCAGTTGGAGCTCGCCATGGTTTCAGTGGCCCTGTACGACATCCGGACTGGAAAATGTCA  
GACAATCCATGGACACAAGGGACCAATCACTGCAGTGGCTTTTGCTCCTGATGGAAGATATCTTGCCA  
CCTACTCAAACACTGACAGCCACATTTCTTTTTGGCAGATGAACACGTCACTGCTGGGAAGCATCGGC  
ATGCTGAACTCGGCACCTCAGCTGCGCTGCATTAACCTACCAGGTGCCCCCTGTGCAGCCCGCGTC  
CCCCGGCTCCCACAATGCCCTCAAGCTGGCCCCGGCTCATCTGGACTTCCAACCGCAACGTCACTCAT  
GGCCCATGACGGGAAGGAGCACCGCTTATGGTCTAATGCTGCTGCCTGCCGCCGTGACTGCGTTTTAG  
TTCTCTAAATTATCCAAGCCGATGTTGCTCTGCTTCCTCACACCAGATTGTTCCAGGGGGCCTGCCC  
ACCCAGTGCCATCCAGTGGCACGGCCGGGTCTTGTCACTTGTGCATGCTTCTCAGGGGCAGAACCCG  
CTCGTGCCATCTGTGATTACAGAGGCACGCACACATGCTCTGCAGGATGTGGCCATCCTGTACCAGG  
TAGTTTTTCCCTGCCAGAGATGGCAGGGGAAAGCCAGTGGTTCCTGGGAACGCTCTTGTTGCTTGGTGC  
AACAGAAGCACAAAAATCAATAAACACTGTGATTGCACTCCAGCCAGATCAGCATTTTTAGCCATC  
TCAACCGCACCTCTGAAGTGCTGCTTGAATCTGGCCGTTCTGACACTGGGTGTTGAGGTCATGTGGCAG  
TCCTCACGATTGAAATTATTGCCCTTTGAATTACCTAAAAATATTGTTTACCAAAAAGATTCTGTGTTTA  
CATGTTCTTTTCTTCTGGTGATTGCTAGGAAATTACTCAATCCAATTTCTGGGTTTAGCTACCACCTTC  
TTTATCAACAGCTAACCAATTTGAGATTGATGATTAATTATGTACACAAAAATATTTTCTTGTAGAAA  
ATAGTTTTCCAGACACTTAGCCTTCTGAAGTGCTCATCTCTTGCTTAAATGATAGTCTATTTAGTAGTTT  
AAAATAAAAAATAATCACTCCCTATGATCTAGTTAATGTAATTATCCAGTCACTGTAACATACTCTTGA  
AGGGACTTTTGTGATAAAGAGCCAAGTTCAGAAGCATAGCGTGTACCGAAAAATGAAGACTCTCCTATC  
TACTGCTACAGATCCTGTTGAAGAAAGAGCTTACCCCTTTCCCCCGGAAAACCTTGCAATCCTGTAGTTC  
CCATATGTGTGGCATATGTCAGTTATGAAATTATTATAATTCAGCCTTCAAACCTACTACTGATCAACTA  
AAGGAAAGCTAATAAGGTATTTCTTTTAAACAAGTATTCTGAAAAAGTAATAACTATGGCACAAATGT  
TCAGGAGTGTATATAAAAAATATGTGGGCTCTCGATTTATTTGAGCAAACATTGCAATGAGGGTGTTCA  
TTATGCTTCTAAGTAAGCTTTAACTAGACCCTTTCTTCTTATGTCAGATTGTGCTGGTTCTAGCTCATA  
ATAATGAAAAAATAGAATTATATTTTGTATGAATTGTTTCTAACAAACCTTGATCTGTATATACTTGT  
GAGGGGTGTTTGGTTGCCTAATTGTTGATTGGTTGGTTAGTTGGGCAAAATCATTATTACATGCAAA  
AATAGAAAATTATTTGTTAAATTCAGAGAAAAATATGTGAAGTTTACAAAGGAACCAAAATGATAATGG  
GAGAATTTAGTCTTAAAGTTTAGGTTGTCAGAGTTTATCTGATATACAAAAAAGTAGGATCAAAGTC  
TAGGAACAAACATTGGTTATTTCACTGAAACAGATTTTTAAAGAGCATATTAAGAAATTAAGACCATT  
AGATCATCTCTTTCATAATGATATGATGTTATTTCCATTGACGGCAAATCTATACTGTTCCCTGGTTTTA  
GAGTTGGGTATTCTTTCAAAGTGAATTTAGGCACATGCATGTACATTGTATTTATAAAGATTATATAT  
GTAGTTTCCAAGGAAGAAACAAAGACCTATACAGTTTAGACTTTATTTGTTTGGTGAACGTGCTGTTGT  
GTTTGGCATAGCTAGAGAAATGTAAGGTAAAAGGCTCACTTTGTTTTCCAGTGGGTCCAGAGTCTTCTC  
TATACCCAACATATGTTTACTTTATGAACCTAAATGGAAATTAATTTATTGTAGACTACATCTCTATTG  
GAATGATGAGGTAAATGTATACCTTAGCATTTTCTTTAACAAAAATGTTCTGTGTGTGTCAGGAAAGAGG  
TGTGAGAGTGGTAGGCAGCCTGCCGCAAACACACGGATGGCTCCCCCGCCACGAAGGTTGAGAACA  
AAGCCAGGGGGCCAGAGGAGCAATAGCCCTGGGCCACAAGCGTGGGTAGGCCTTTCACGTATTCCG  
TCTGCACAGGCAACCAAGGCCAGTAGAAAGCTATGGCTGCAAAACCCTGGGGTGGACGATGTTTGAT  
GATTAGACGGTCATCTCTAACTACTAACTAATATCTGCATTCTTGTTAACATAAATCTCTCCTTGCT  
ATTTTAATAGCCACAGTCCCAAACCTTCATCCAGCTTAGATTTCTCAGCACTGAGGTAAACTCTGCATT  
GTCATCCCAGCGTACACCTTTAATGTTTTATTGATTTCACTGGCACTGTATTTGGACCTGTCCTTGATA  
TGTAGAGACATATGTGGCTTCATTGGTAATTTACAAGCAAAAGATGACATGACGTGACACCTGTATGA  
AAATGTGATGATTGAACTCCCTGTGTACAGCGAGTGAATTAATGTCTGCCTCTCCAGACATTTCTTA  
ATGATTCCACTTAATAGACTCTATGTGTGCTGAATGTTCTGTGTACATATGTGTGTTAAATAAAACAA  
TTGTATTGAA

**H) Amino acid sequence: WDR7 protein truncation (1039 aa)**

MAGNSLVPIVLWGRKAPTHCISAVLLTDDGATIVTGCHDQICLWDLSELQINPRALL  
FGHTASITCLSKACASSDKQYIVSASESGEMCLWDVSDGRICIEFTKLACTHTGIQFYQFS  
VGNQREGRLCHGHYPEILVVDATSEVLVSLVSKISPDWISSMSIIRSHRTQEDTVVAL  
SVTGILKVWIVTSEISDMQDTEPIFEEESKPIYCQNCQSISFCAFTQRSLLVVCISKYWRV

FDAGDYSLLCSGPSENGQTWTGGDFVSSDKVIIWTENGQSYIYKLPASCLPASDSFRSDV  
GKAVERNIPPVQHILLDRKDKELLICPPVTRFFYGREYFHKLLIQGDSSGRLNIWNISD  
TADKQGSEGLAMTTISLQEAFDKLNPCAGIIDQLSVIPNSNEPLKVTASVYIPAHGR  
LVCGREDGSIVVPATQTAIVQLLQGEHMLRRGWPPHRTLGRHRNKVTCLLYPHQVSARY  
DQRYLISGGVDFSVIIWDIFSGEMKHIFCVHGG EITQLLVPENC SARVQHCICSVASDH  
SVGLLSLREKKCIMLASRHLFP IQVIKWRP SDDYL VVGCS DGSVYVWQMDTGALDRCVMG  
ITAVEILNACDEAVPAAVDSL SHPAVN LKQAMTRRSLAALKNMAHHKLQTLATNLLASEA  
SDKGNLPKYSHNSLMVQAIKTNL TDPDIHVLFFDVEALIIQLL TEEASRPNTALISPENL  
QKASGSSDKGGSFLT GKRAAVLFQQVKETIKENIKEHLLDDEEEDEEIMRQRREESDPEY  
RSSKSKPLTLLEYNL TMDTAKLFMSCLHAWGLNEVLDEVCLDRLGMLKPHCTVSFGLLSR  
GGHMSMLPGYNQPACKLSHGKTEVGRKLPASEGVGKGTYGVSRAVTTQHLLSHSLANT  
LMSMTNATFIGDHMKKG PTRPPRPSTPDL SKARGSPPTSSNIVQGQIKQVAAPVVSARSD  
ADHSGSDPPSAPALHTCFLVNEGWSQLAAMHCVMLPDLLGLDKFRPP **LLEMLARRLARSM**  
**LGGERSRAGPASGGTEKN\***

**I) WDR7 KO cell line 2 (sgRNA 5): Indel 'G' deletion**

ATGGCAGGAAACAGCCTTGTTCTACCCATTGTTCTTTGGGGTCGAAAAGCGCCACACATTGCATCTCA  
GCCGTACTTTTAACAGATGATGGGGCCA **CGATCGTAACAGGATGTCAC** GACGGACAAATATGTCTCTG  
GGATCTTTCAGTAGAACTGCAAATTAATCCTCGAGCACTGTTGTTGGTCATACAGCATCAATCACTTG  
TTTGCTAAAGCTTGCTTCCAGTGACAAACAGTATATTGTGAGTGCATCTGAAAGTGGAGAGATGT  
GCCTCTGGGATGTGAGTGATGGCAGATGTATTGAATTTACAAAATTAGCTTGCACACATACTGGCATA  
CAGTTCTACCAGTTCTCTGTTGGGAATCAGCGAGAAGGAAGGCTTTTATGCCACGGACATTACCCTGA  
AATCCTTGTTGTGGATGCTACCAGCCTTGAAGTATTATACTCCTTAGTATCAAAGATATCACCAGACTG  
GATTAGCTCCATGAGTATTATTCGATCCCACCGAACACAAGAGGACACAGTGGTAGCACTCTCGGTGA  
CTGGCATCCTGAAGGTCTGGATTGTTACCTCGGAAATAAGTGACATGCAGGATACTGAGCCAATATTT  
GAGGAGGAATCCAAACCAATTTATTGTCAGAATTGCCAAAGCATCTCTTTTTGTGCATTTACACAAAG  
GTCACTTTTGGTTGTGTGTTCCAAATATTGGAGGGTGTTTCGATGCCGGAGACTATTCCTTGTTGTGTT  
AGGTCCTAGTGAAAATGGACAGACATGGACCGGGGGGGGACTTTGTCTCATCAGATAAAGTCATCATT  
GGACAGAAAATGGGCAAAGTTATATTTACAACTACCTGCCAGTTGCCTTCCAGCTAGTGATTCATTC  
CGCAGTGATGTGGGGAAGGCAGTTGAAAATTTAATTCCTCCTGTACAACATATCCTCTTGATCGAAA  
AGATAAAGAGTTGCTAATTTGTCCTCCTGTTACTCGGTTCTTCTATGGATGCAGAGAATATTTCCATAA  
ACTGTTAATTCAGGGTGATTCTTCTGGAAGGTTGAATATTTGGAACATATCAGACACAGCTGATAAAC  
AGGGAAGTGAAGAAGGGCTGGCAATGACAACTTCTATTAGTTTGCAAGAGGCATTTGATAAACTGAAT  
CCTTGCTCTGCTGGAATTATAGATCAGCTGAGTGTGATTCCCAATAGTAATGAACCTCTTAAAGTAACT  
GCAAGTGTGTACATACCAGCACATGGACGACTTGTTTGTGGTCGTGAAGATGGAAGCATAGTTATTGT  
ACCTGCCACACAGACGGCCATAGTACAGCTGTTGCAAGGGGAACACATGCTCAGAAGAGGTTGGCCA  
CCTCACAGAACTCCGTGGTCATCGGAACAAAGTCACATGTTTGCTATATCCTCATCAGGTCTCAGCT  
CGGTATGATCAAAGATACCTGATATCTGGAGGTGTGGATTTTTCAGTCATAATTTGGGACATATTTCT  
GGAGAAATGAAACATATCTTCTGTGTTTCATGGTGGTGAGATTACTCAACTTCTAGTTCCACCTGAAAAC  
TGTAGTGCAAGAGTACAGCACTGCATCTGCTCTGTAGCCAGTGACCACTCAGTAGGACTTCTAAGTTT  
GCGAGAGAAAAATGCATAATGTTGGCATCTCGTCACCTTTTTCCTATTCAAGTAATCAAATGGAGGC  
CTTCTGATGATTACCTGGTGGGTGTTTCAGATGGTTCTGTGTACGTCTGGCAAATGGATACTGGTG  
CATTGGATCGTTGTGTGATGGGGATAACAGCAGTTGAGATTCTAAACGCTTGTTGATGAAGCTGTTCCCT  
GCTGCTGTTGATTCACTTAGTCATCCAGCAGTCAACCTAAAACAAGCTATGACGAGACGTAGTCTTGCT  
GCTCTTAAAAATATGGCCATCATAAGCTACAAACCCTTGCAACTAACCTCTTGGCTTCTGAGGCATCT  
GACAAGGGAAATTTACCTAAATATTCTCATAACTCCCTGATGGTTCAAGCAATAAAGACAAACCTAAC  
AGACCCGGACATACATGTGCTATTCTTTGATGTGGAAGCGTTGATTATTCAACTCCTGACTGAAGAAG  
CCTCTAGGCCGAATACTGCTCTTATTTCCCAGAGAATTTGCAAAAAGCATCTGGCAGTTCAGACAAA  
GGGGGCTCTTTTTTAAGTGGAAAACGAGCAGCAGTTCTCTTCCAACAAGTGAAAGAAACGATCAAAGA  
GAACATCAAGGAACACCTCCTTGATGATGAAGAGGAGGATGAGGAGATAATGAGGCAGAGAAGGGA  
AGAAAGTGATCCTGAATATCGGTCCAGCAAATCAAAGCCATTGACCCTATTAGAATATAATTTAACTA  
TGGACACTGCAAAGCTGTTTATGTCCTGCCTTCACGCCTGGGGTTTGAATGAAGTACTGGATGAAGTTT  
GCCTGGATCGCCTTGGAATGCTGAAACCCCACTGCACCGTATCGTTTGGCCTCTTGTCAGAGGAGGC  
CATATGTCACTGATGCTGCCGGGTTATAATCAGCCTGCTTGAAACTGTCACATGGGAAAACAGAAGT  
AGGAAGGAAGCTGCCAGCGTCTGAGGGAGTAGGAAAGGGAACCTTACGGAGTGTCCTGCGGTCACCA  
ACACAGCATCTCCTGTCTATCATTCTTTGGCAAATACTTTAATGAGTATGACCAATGCAACTTTTATT

GGTGATCATATGAAGAAGGGTCCTACCAGGCCACCTAGACCAAGCACCCCAGACCTTTCTAAGGCAAG  
GGGTTCCCTCCAATTCCAGTAATATTGTGCAAGGACAGATTAAACAAGTTGCTGCACCTGTCGTTTC  
CGCTCGGTCTGATGCTGATCACTCTGGCTCTGACCCTCCTTCTGCTCCTGCTTTACATACCTGTTTCTTA  
GTAAATGAAGGTTGGAGTCAGTTAGCTGCTATGCACTGTGTTATGCTGCCAGACCTACTGGGATTGGA  
TAAATTTAGGCCTCCCCTTCTGGAGATGCTGGCCCGAAGAT GCAAGATCGATGCTTGGAGGTGAGAG  
AAGCCGCGCAGGCCCTGCTTCTGGCGGAAGTGAAGAATTGAGCAGGCAGGCAGGAAGGAAGCCAT  
TGATGCCTGGGCTCCTTACTTACCTCAGTACATAGACCACGTCATATCACCTGGAGTCACATCAGAAGC  
CGCGCAGACTATCACCACGGCTCCTGATGCCTCAGGGCCTGAAGCAAAAGTCCAGGAGGAAGAGCAT  
GACCTTGTTGACGATGACATCACCCTGGTTGCTTATCAAGTGTCCCAAAATGAAAAAATTTCTAC  
ATCTTACGAGGAAAGACGGAAGCAAGCTACCGCTATTGTTTTACTTGGAGTAATAGGAGCTGAATTTG  
GTGCTGAAATTGAACCTCCTAAACTATTGACCAGACCTCGAAGCTCTAGCCAAATTCCTGAGGGATTCT  
GGGTTGACTAGTGGTGGATCCAACTACTCGCTGGCCAGACATACTTGCAAGGCACTGACGTTTCTTCTG  
CTACAGCCTCCAAGCCCCAACTTCTCCACACAGCACTATCCGAAGAACAGCCATTGATCTGATTGG  
ACGTGGGTTCACTGTTTGGGAGCCTTACATGGATGTGTCCGCTGTTCTGATGGGGCTTCTCGAAGCTTTG  
TGCCGATGCCGAGAAACAATTGCCAACATCACAATGGGGTTGCCTCTGAGCCAGCAGCTGACTCGG  
CCCGCTCTGCGAGGCATGCCCTCTCGCTCATTGCCACCGCCAGACCACCCGCCTTACATCACCACCATAG  
CCAAAGAGGTACACAGACATACGGCTCTTGACAGCAAAATACCAATCACAGCAGAATGACACACAAC  
AACTCTTGACGAGCTAAAGGGGAAATTTTGAGAGTCATTGAAATTCCTTATTGAAAAGATGCCACAG  
ATGTTGTGGATCTTCTCGTGGAGGTTATGGACATCATTATGTACTGCCTTGAAGGATCTTTAGTTAAAA  
AGAAAGGTCTTCAAGAATGTTTCCCAGCCATCTGCAGGTTCTACATGGTCAGCTATTATGAGCGGAAT  
CACAGAATAGCAGTTGGAGCTCGCCATGGTTTCAGTGGCCCTGTACGACATCCGGACTGGAAAATGTCA  
GACAATCCATGGACACAAGGGACCAATCACTGCAGTGGCTTTTGTCTCCTGATGGAAGATATCTTGCCA  
CCTACTCAAACACTGACAGCCACATTTCTTTTTGGCAGATGAACACGTCACTGCTGGGAAGCATCGGC  
ATGCTGAACCTCGGCACCTCAGCTGCGCTGCATTAAAACCTACCAGGTGCCCCCTGTGCAGCCCGCGTC  
CCCCGGCTCCCACAATGCCCTCAAGCTGGCCCGGCTCATCTGGACTTCCAACCGCAACGTCATCCTCAT  
GGCCCATGACGGGAAGGAGCACCCTTATGGTCTAATGCTGCTGCCTGCCGCCGTGACTGCGTTTTAG  
TTCTCTAAATTATCCAAGCCGATGTTGCTCTGCTTCTCCTCACACCAGATTGTTCCAGGGGCCTGCCC  
ACCCAGTGCCATCCAGTGGCACGGCCGGTCTTGTCACTTGTGCATGCTTCTCAGGGGCAGAACCCG  
CTCGTGCCATCTGTGATTGAGAGGCACGCACACATGCTCTGCAGGATGTGGCCATCCTGTCACCAGG  
TAGTTTTTCCCTGCCAGAGATGGCAGGGGAAAGCCAGTGGTTCCTGGGAACGCTCTTGTTGCTTGGTGC  
AACAGAAGCACAAAAATCAATAAACACTGTGATTGCACTCCCAGCCCAGATCAGCATTTTTAGCCATC  
TCAACCGCACCTCTGAAGTGCTGCTTGAATCTGGCCGTTCTGACACTGGGTGTTGAGGTCATGTGGCAG  
TCCTCACGATTGAAATTATTGCCCTTTGAATTACCTAAAAATATTGTTTACCAAAAAGATTCTGTGTTTA  
CATGTTCTTTTCTTCTGGTGATTGCTAGGAAATTACTCAATCCAATTTCTGGGTTTAGCTACCACCTTC  
TTTATCAACAGCTAACCAATTTGAGATTCATGATTAAATTATGTACACAAAAATATTTTCTTGTAGAAA  
ATAGTTTTCCAGACACTTAGCCTTCTGAAGTGCTCATCTCTTGCTTAAATGATAGTCTATTTAGTAGTTT  
AAAATAAAAAATAATCACTCCCTATGATCTAGTTAATGTAATTATCCAGTCACTGTAACCTAATCTCTTGA  
AGGGACTTTTGTGATAAAGAGCCAAGTTCAGAAGCATAGCGTGTACCGAAAATGAAGACTCTCCTATC  
TACTGCTACAGATCCTGTTGAAGAAAGAGCTTACCCCTTTCCCCCGGAAAACCTTGCAATCCTGTAGTTC  
CCATATGTGTGGCATATGTCAGTTATGAAATTATTATAATTGAGCCTTCAAACCTACTACTGATCAACTA  
AAGGAAAGCTAATAAGGTATTTCTTTTAAACAAGTATTCTGGAAAAGTAATAACTATGGCACAAATGT  
TCAGGAGTGTATATAAAAAATATGTGGGCTCTCGATTTATTTGAGCAAACATTGCAATGAGGGTGTTCA  
TTATGCTTCTAAGTAAGCTTTAACTAGACCCTTTCTTCTTATGTGAGATTGTGCTGGTTCTAGCTCATA  
ATAATGAAAAAATAGAATTATATTTTGTATGAATTGTTTCTAACAACCTTGATCTGTATATACTTGT  
GAGGGGTTGTTTGGTTGCCTAATTGTTGATTGGTTGGTTAGTTGGGCAAAATCATTTATTACATGCAAA  
AATAGAAAATTTTGTAAATTCAGAGAAAAATATGTGAAGTTTACAAAGGAACCAAAATGATAATGG  
GAGAATTTAGTCTTAAAGTTTGGTTGTCAGAGTTTATCTGATATACAAAAAAGTAGGATCAAAGTC  
TAGGAACAAACATTGGTTATTTCACTGAAACAGATTTTAAAGAGCATATTAAGAAATTAAGACCATT  
AGATCATCTCTTTCATAATGATATGATGTTATTTCCATTGACGGCAAATCTATACTGTTCCCTTGGTTTA  
GAGTTGGGTATTCTTTCAAAGTGAATTTAGGCACATGCATGTACATTGTATTTATAAAGATTATATAT  
GTAGTTTCCAAGGAAGAAACAAAGACCTATACAGTTTAGACTTTATTTGTTTGGTGAACGTGCTGTTGT  
GTTTGGCATAGCTAGAGAAATGTAAGGTAAAAGGCTCACTTTGTTTTCCAGTGGGTCCAGAGTCTTCTC  
TATACCAACATATGTTTACTTTATGAACTTAAATGGAAATTAATTTATTGTAGACTACATCTCTATTTG  
GAATGATGAGGTAAATGTATACCTTAGCATTTTCTTTAACAACAAATGTTCTGTGTGTCAGGAAAGAGG  
TGTGAGAGTGGTAGGCAGCCTGCCGCAACACACGGATGGCTCCCCCGCCACGAAGGTTGAGAACA  
AAGCCAGGGGGCCCAGAGGAGCAATAGCCCTGGGCCACAAGCGTGGGTAGGCCTTTCACGTATTCCG

TCTGCACAGGCAACCAAGGCCAGTAGAAAGCTATGGCTGCAAAACCCTGGGGTGGACGATGTTTGAT  
 GATTAGACGGTCATCTCTAACTACTAACTAATATCTGCATTCTTGTTAACATAAAATCTCTCCTTGGCT  
 ATTTTAATAGCCACAGTCCCAAACCTTCATCCCAGCTTAGATTTCTCAGCACTGAGGTAAACTCTGCATT  
 GTCATCCCAGCGTACACCTTTAATGTTTTATTGATTTCACTGGCACTGTATTTGGACCTGTCCTTGTATA  
 TGTAGAGACATATGTGGCTTCATTGGTAATTTACAAGCAAAAGATGACATGACGTGACACCTGTATGA  
 AAATGTGATGATTGAACTCCCTGTGTACAGCGAGTGAATTAATAATGTCTGCCTCTCCAGACATTTCTTA  
 ATGATTCCACTTAATAGACTCTATGTGTGCTGAATGTTCTGTGTACATATGTGTGTTAAATAAAACAA  
 TTGTATTGAA

**J) Amino acid sequence: WDR7 protein truncation (1023aa)**

MAGNSLVLPVLWGRKAPTHCISAVLLTDDGATIVTGCHDQGICLWDLSELQINPRALL  
 FGHTASITCLSKACASSDKQYIVSASESGEMCLWDVSDGRGCIETKLACTHTGIQFYQFS  
 VGNQREGRLCHGHYPEILVVDATSLVLYSLVSKISPDWISSMSIIRSHRTQEDTVVAL  
 SVTGILKVWIVTSEISDMQDTEPIFEEESKPIYCQNCQSISFCAFTQRSLLVVCISKYWRV  
 FDAGDYSLLCSGPSENGQWTWGDFVSSDKVIIWTENGQSYIYKLPASCLPASDSFRSDV  
 GKAVENLIPPVQHILLDRKDKELLICPPVTRFFYGCREFYHKLLIQGDSSGRLNIWNISD  
 TADKQGSSEGLAMTTISLQEAQFDKLNPCAGIIDQLSVIPNSNEPLKVTASVYIPAHGR  
 LVCGREDGSIVVPATQTAIVQLLQGEHMLRRGWPPHRTLGRHNRKVTCLLYPHQVSARY  
 DQRYLISGGVDFSVIIWDIFSGEMKHIFCVHGGIEITQLLVPPENC SARVQHCICSVASDH  
 SVGLLSLREKKCIMLASRHLFPQVIKWRPSDDYLVVGCSDGSVYVWQMDTGALDRCVMG  
 ITAVEILNACDEAVPAAVDSLSPAVNLKQAMTRRSLAALKNMAHHKLQTLATNLLASEA  
 SDKGNLPKYSHNSLMVQAIKTNLTDPDIHVLFFDVEALIIQLL TEEASRPNTALISPENL  
 QKASGSSDKGGSFLTGKRAAVLFQQVKETIKENIKEHLLDDEEEDDEEIMRQRREESDPEY  
 RSSKSKPLTLLEYNL TMDTAKLFMSCLHAWGLNEVLDEVCLDRLGMLKPHCTVSFGLLSR  
 GGHMSLMPLPGYNQPACKLSHGKTEVGRKLPASEGVGKGTYGVSRAVTTQHLLSIISLANT  
 LMSMTNATFIGDHMKKGPTPRPSTPDLSKARGSPPTSSNIVQGQIKQVAAPVVSARS  
 ADHSGSDPPSAPALHTCFLVNEGWSQLAAMHCVMLPDLLGLDKFRPPLLEMLARRCKIDA  
 WR\*

## II. *WDR7* gene sequences of wild-type and *WDR7* knock-out A549 cells obtained by Sanger sequencing.

A, C. Wild-type A549 cells. B, D. Negative CT control cells.

Results of Sanger sequencing of wild-type A549 cells and negative CT control cells.

The sgRNA binding regions of exon 2 and exon 17 are highlighted in yellow.

**A) Nucleotide sequence of *WDR7* gene, exon 2 region, in wild-type A549**

cellsAGCGCCACACATTGCATCTCAGTAGGTACTTTTAACAGATGATGGGGCCACGATCGTAACAGGA  
 TGTCACTGACGGACAAATATGTCTCTGGGATCTTTCAGTAGAACTGCAAGTGAGTATGTGAAATGCCTA  
 TTATACATTTTAGATATAAAAAATCTACTTATTAGAAGATAATATAGTCCCCGAATGATGCTTTTGGGCC  
 CACAGTAGATTTTCTGAAAAATGTGTTTTGACTAAAAGTAGTAGTATACAGATTCATTATTTACACTAT  
 TCATCAGAGTTGACTTCTGAGGGGCTTTTGGCCATTTTCAATTGTAATATCTACCCTAAGTGACTTACTGT  
 TTTGTTACATTTAAGATTTTCAAATGATGATGACCCATACTGAAGAAGGTTTTCCAAAGAGGTTTTAG  
 AAAATTTAAACACTTAAACCTTCTATGGTAAATGCTTTGAAGAGGGCAAACTTTTTACAAAGTAT  
 AGATTTTGTTGTATTGATTAATGACTGTGCCTTTATTGTCATTCCTTACTACTATGGATTGCTCAGTGTG  
 CTCTGCTTCCAGGA

**B) Nucleotide sequence of *WDR7* gene, exon 2 region, in negative CT control cells**

CGGTACTTTTAACAGATGATGGGGCCAAGATCGTAACAGGATGTCACTGACGGACAAATATGTCTCTGG  
 GATCTTTCAGTAGAACTGCAAGTGAGTATGTGAAATGCCTATTATACATTTTAGATATAAAAAATCTACT  
 TATTAGAAGATAATATAGTCCCCGAATGATGCTTTTGGGGCCACAGTAGATTTTCTGAAAAATGTGTTT  
 TGAATAAACTAGTAGTATACAGATTCATTATTTACACTATTCATCAGAGTTGACTTCTGAGGGGCTTTT  
 GGCCATTTTCAATTGTAATATCTACCCTAAGTGACTTACTGTTTTGTTACATTTAAGATTTTCAAATGA

TGATGACCCATACTGAAGAAGGTTTTCCAAAGAGGTTTTAGAAAATTTAAAACACTTAAAACCTTCTA  
TGGTAAATGCTTTGAAGAGGGCAAACTTTTTACAAAGTATAGATTTTGTGTATTGATTAATGACTGT  
GCCTTTATTGTCATTCCCTACTACTATGGATTGCTCAGTGTGCTCTGCTTCCA

**C) Nucleotide sequence of *WDR7* gene, exon 17 region, in wild-type A549 cells**

ACACAGTGGTAACACACAGATGGCCATGCCTTAAGTGACATGAACCTATTTTTGGATATCTGTGTGAA  
TGCCCTTTTAACTGACAGTGGTTTCAAATCTATAGCTCTAGTATGTGTTTATTTCTGTGTTTTGCCATT  
TTTAATATATATTTTATTTTAGAGGGACTGTTAAGAAATGTGTTTTTCTTGTGAATTTGGATATACTTCC  
AGTGGAATTTATTTTTATTTCTTTTAAGATGTTGAGAATTCTTATAGGCACCAATTACATGATTTAGG  
GATGAAATACGTTTAGTATAATTCTTTGCACAAAGTGTCTACTATTAAATTGAAATCATTTGTAATATA  
ACTTAGCAGATCTGCCTTTTTTTGTTTTGGTATACTTACATAAAGAACTGTTGACTTAGGGAATGCCA  
AAATGGTTAAAGAATTTGTAATATATTACATTTTTGACAGGTTGGAGTCAGTTAGCTGCTATGCACTGT  
GTTATGCTGCCAGACCTACTGGGATTGGATAAATTTAGGCCTCCCCTTCTGGAGATGCTGGCCCCG**AAG**  
**ATGGCAAGATCGATGCT**TGGAGGTAATGCTAAAGTGATAAGGATAGAAAACAAAAATATAAAAAGG  
CATTGGTCAAATGTAACTTGAACAAAAATGATTACTGTTTATCTGATTTATCATCTGTTTATTATGT  
GATAGAAAATGTGGATTCATGATTTATGTTTTCTTCTTTGTCAGCTTTTATACCAACCAGTAATGCTCCA  
GCTGGTTTATTCGTTTACTTTTAAAGAATTCAGTGACTGTTTGATGAAGTCTTATATACTTTATGGAAC  
ATTTCTTAAGTTTGGTTTCTGTACGGATCACACACACTCATGC

**D) Nucleotide sequence of *WDR7* gene, exon 17 region, in negative CT control cells**

TGACAGTGGTTTCAAATCTATAGCTCTAGTATGTGTTTATTTCTGTGTTTTGCCATTCTTTAATATATAT  
TTTATTTTAGAGGGACTGTTAAGAAATGTGTTTTTCTTGTGAATTTGGATATACTTCCAGTGGAATTT  
ATTTTTATTTCTTTTAAGATGTTGAGAATTCTTATAGGCACCAATTACATGATTTAGGGATGAAATACG  
TTTAGTATAATTCTTTGCACAAAGTGTCTACTATTAAATTGAAATCATTTGTAATATAACTTAGCAGAT  
CTGCCTTTTTTTGTTTTGGTATACTTACATAAAGAACTGTTGACTTAGGGAATGCCAAAATGGTTAAA  
GAATTTGTAATATATTACATTTTTGACAGGTTGGAGTCAGTTAGCTGCTATGCACTGTGTTATGCTGCC  
AGACCTACTGGGATTGGATAAATTTAGGCCTCCCCTTCTGGAGATGCTGGCCCCG**AAGATGGCAAGATC**  
**GATGCT**TGGAGGTAATGCTAAAGTGATAAGGATAGAAAACAAAAATATAAAAAGGCATTGGTCAAA  
TGTAACCTTGAACAAAAATGATTACTGTTTATCTGATTTATCATCTGTTTATTATGTGATAGAAAATG  
TGGATTCATGATTTATGTTTTCTTCTTTGTCAGCTTTTATACCAACCAGTAATGCTCCAGCTGGTTTATT  
CGTTTACTTTTAAAGAATTCAGTGACTGTTTGATGAAGTCTTATATACTTTATGGAACATTTCTTAAGT  
TGGTTCT
