# Supplementary material for: Identification of Host Factors for Rift Valley Fever Phlebovirus
Source: MDPI journal article supplement (doi:10.3390/v15112251), 2023-11-13
Supplement: s1 [file s1]

### Supplementary Table S1:

**Location of the *indels* in the *WDR7* gene of knock-out A549 cells.** Represented are the predominant *indels* in the *WDR7* gene of the *WDR7* knock-out cell lines 1 and 2. The sgRNA binding sites on the *WDR7* gene are highlighted in yellow and the *indels* and the corresponding amino acid changes are highlighted in red. Predicted full nucleotide and amino acid sequences are included in the Supplementary File S2-I.

| Indels                                                     | Nucleotide sequence- <i>WDR7</i> gene (5'-3') | Amino acid sequence                                         |
|------------------------------------------------------------|-----------------------------------------------|-------------------------------------------------------------|
| Predicted nucleotide sequence- <i>WDR7</i> gene - Exon-2   | ATG.....ACGATCGTAACAGGATGTCACGAC...           | M...TIVTGCHD...                                             |
| <i>WDR7</i> KO cell population 1- Exon-2- 'A' insertion    | ATG.....ACGAATCGTAACAGGATGTCACGAC..           | M...TNRNRMSR...<br>(frame shift mutation-early termination) |
| <i>WDR7</i> KO cell population 1-Exon-2- 'T' deletion      | ATG.....ACGA CGTAACAGGATGTCACGAC..            | M...TT*<br>(Stop Codon)                                     |
| Predicted nucleotide sequence - <i>WDR7</i> gene - Exon-17 | ATG.....CGAAGATGGCAAGATCGATGCTTGG....         | M...RRWQRCL...                                              |
| <i>WDR7</i> KO cell population 2- Exon-17- 'T' insertion   | ATG.....CGAAGATTGGCAAGATCGATGCTTGG....        | M...RRLARSML...<br>(frame shift mutation-truncation)        |
| <i>WDR7</i> KO cell population 2- Exon-17- 'G' deletion    | ATG.....CGAAGAT GCAAGATCGATGCTTGG....         | M...RRCKIDAW...<br>(frame shift mutation-truncation)        |

## Supplementary Table S2.

### Primers used for RT-qPCR, NGS and Sanger sequencing.

| Gene                 | Primer                 | Sequence                                                         |
|----------------------|------------------------|------------------------------------------------------------------|
| WDR7                 | WDR7-1 Forward         | TTTATGCCACGGACATTACCC                                            |
|                      | WDR7-1 Reverse         | GGAGCTAATCCAGTCTGGTGATA                                          |
| LRP1                 | LRP1-1 Forward         | AGCCAGCTATGCACCAACAC                                             |
|                      | LRP1-1 Reverse         | CCTTGCAGGAGCGGTTATC                                              |
| SLC35B2              | SLC35B2-1 Forward      | AGGTGATCCCTGTCTATGCTGA                                           |
|                      | SLC35B2-1 reverse      | CGCTGGATAGCAGAAACATGC                                            |
| EMC3                 | EMC3-1 Forward         | GTGGTCTACCCATCGTTATC                                             |
|                      | EMC3-1 Reverse         | CAGATACTTGTTCTGGGTGAG                                            |
| EXOC4                | EXOC4-1 Forward        | ACAGGTACGTTAATAGTTAATAGCGT                                       |
|                      | EXOC4-1 Reverse        | TCGTCAATTCTGTGTAGTGCTG                                           |
| GAPDH                | GAPDH Forward          | TGTAGTTGAGGTCAATGAAGGG                                           |
|                      | GAPDH Reverse          | ACATCGCTCAGACACCATG                                              |
| CT47A1               | CT47A1-1 Forward       | CGTCTGAGACAGACTCTTATTCC                                          |
|                      | CT47A1-1 Reverse       | TGACCACTGAGGTGGCTA                                               |
| WDR7 Exon 2          | Wsg1-indel-R1-Forward  | CTTTCCTACACGACGCTCTTCCGATCTcCACAAACACAATGGCAGGAAACAG             |
|                      | Wsg1-indel-R1-Reverse  | GACTGGAGTTCAGACGTGTGCTCTTCCGATCT-GGCCAAAAGCATCATTTGG             |
| WDR7 Exon 17         | Wsg5-indel-R1-Forward  | CTTTCCTACACGACGCTCTTCCGATCTtttGACAGGTTGGAGTCAGTTAGCTGC           |
|                      | Wsg5-indel-R1-Reverse  | GACTGGAGTTCAGACGTGTGCTCTTCCGATCT-CAAGTTTACATTTGACCAATGCC         |
| NGS- WDR7 Exon 2     | NGS-indel-R2-Forward-1 | AATGATACGGCGACCACCGAGATCTACACTATAGCCTACACTCTTTCCTACACGACGCTCTTCC |
|                      | NGS-indel-R2-Reverse-1 | CAAGCAGAAGACGGCATACGAGATCGAGTAATGTGACTGGAGTTCAGACGTGTGCTCTTC     |
| NGS-WDR7 Exon 17     | NGS-indel-R2-Forward-2 | AATGATACGGCGACCACCGAGATCTACACATAGAGGCACACTCTTTCCTACACGACGCTCTTCC |
|                      | NGS-indel-R2-Reverse-2 | CAAGCAGAAGACGGCATACGAGATTCTCCGGAGTGACTGGAGTTCAGACGTGTGCTCTTC     |
| Sanger - WDR7 Exon 2 | sWsg1 Forward          | TCCCAGCAGGATCTACGCAC                                             |
|                      | sWsg1 Reverse          | GTCCTCTTGTGTTTCGGTGGG                                            |
| Sanger-WDR7 Exon 17  | sWsg5 Forward          | GCCACCTAGACCAAGCACC                                              |
|                      | sWsg5 Reverse          | CGGATAGTGCTGTGTGGAGG                                             |

## Supplementary Table S3:

### Primer and probes for the detection of viral RNA by RT-qPCR.

| Gene        | Primer/Probe      | Sequence                                               | Ref.                                   |
|-------------|-------------------|--------------------------------------------------------|----------------------------------------|
| LACV gene L | RT-qPCR LAC fwd   | AGGAAACTCCTGAGAAATAACTA                                | (none)                                 |
|             | RT-qPCR LAC rev   | GGTATACAAACTGGTGGCGAT                                  |                                        |
|             | Rt-qPCR LAC probe | 6-FAM-CTTAAATTTGAAAATATGTCTAAAATCCAAACATACCCAGGC-BHQ-1 | Bird et al., JCM, 2007, 45:11(3506-13) |
| RVFV gene L | RVFL-2912fwdGG    | TGAAAATTCCTGAGACACATGG                                 |                                        |
|             | RVFL-2981revAC    | ACTTCCTTGCATCATCTGATG                                  |                                        |
|             | RVFL-probe-2950   | 6-FAM-CAATGTAAGGGGCTGTGTGGACTTGTG-BHQ1                 | OriGene, Rockville, MD, USA            |
| PGK1 gene   | PGK1 fwd          | GCCACTTGCTGTGCCAAATG                                   |                                        |
|             | PGK1 rev          | CCCAGGAAGGACTTTACCTT                                   |                                        |

Fwd=forward; rev=reverse; OriGene: PGK1 primer sequence was obtained from OriGene
