# Supplementary material for: Identification of Host Factors for Rift Valley Fever Phlebovirus
Source: Viruses. 2023 Nov 13;15(11):2251. doi: 10.3390/v15112251 (PMC10675714; doi:10.3390/v15112251)
Supplement: Supplementary file 1 [file viruses-15-02251-s001.zip]

Archive with 4 entries (4 files):
- Supplementary File S1 corrected FINAL JAR.xlsx
- Supplementary File S2 corrected JAR.pdf
- Supplementary_figures corrected FINAL JAR.pdf
- Supplementary_Tables corrected FINAL JAR.pdf
