# Supplementary material for: Identification of Host Factors for Rift Valley Fever Phlebovirus
Source: Viruses. 2023 Nov 13;15(11):2251. doi: 10.3390/v15112251 (PMC10675714; doi:10.3390/v15112251)
Supplement: Supplementary file 1 [file viruses-15-02251-s001.zip › Supplementary File S1 corrected FINAL JAR.xlsx]

## Sheet: Enriched_gene_list
	Supplementary File S1
	A) List of genes enriched in round 1 virus-infected A549 GeCKO cells										B) List of genes enriched in round 3 virus-infected A549 GeCKO cells
	id = gene name										id = gene name
	pos|rank = gene rank										pos|rank = gene rank
	pos|goodsgrna = number of sgRNA enriched for each gene										pos|goodsgrna = number of sgrna enriched for each gene
	Highlighted genes were selected for siRNA screen										Highlighted genes were selected for siRNA screen
	id	pos|rank	pos|goodsgrna								id	pos|rank	pos|goodsgrna
	WDR7	1	5								LRP1	1	5
	ATP6AP2	2	6								WDR7	2	5
	ATP6V0C	3	6								CT47A1	3	5
	ATP6V1H	4	6								EXOC4	4	5
	CCDC115	5	5								ART3	5	5
	TMEM199	6	6								CEBPD	6	2
	SLC35B2	8	5								EMC3	7	5
	ATP6V0D1	9	6								PQLC1	9	4
	AKR1A1	10	6								ZCCHC3	10	5
	CACNG6	11	4								SLC35B2	11	4
	EMC3	12	4								TP53	12	5
	ATP6AP1	13	6								GAGE1	14	6
	CT47A1	14	5								LHFPL2	15	3
	TADA1	15	6								A2ML1	16	4
	TTC13	16	5								FAIM2	17	4
	LRP1	17	5								NT5C1A	18	3
	ATP6V0B	18	5								FAM73A	19	4
	ATP6V1B2	19	5								MUC16	20	4
	CD52	20	5								C11orf73	21	4
	CRTAP	21	4								LRPPRC	22	3
	RANBP6	22	5								MAGEB1	23	5
	EXOC8	23	6								MIER3	24	6
	MPZ	24	2								MMADHC	25	4
	EXOC4	25	5								BCORL1	26	4
	TRIM39-RPP21	26	2								C6orf70	27	4
	NPM3	27	4								TTC13	28	4
	SLC35A1	28	3								CYYR1	29	3
	ATP9B	29	2								GRINA	30	2
	RXFP1	30	5								PCDHB5	31	5
	HNRNPD	31	4								RBAK	32	6
	PRB1	32	6								STXBP5	33	6
	ZNF485	33	5								FAN1	34	4
	PCDHGA1	34	5								HNF1B	35	4
	KIRREL2	35	5								AKR1A1	36	5
	PINK1	36	3								PMAIP1	37	4
	CEBPD	37	2								PRSS58	38	3
	COL5A3	38	4								KRT78	39	4
	UGT1A1	39	5								PHIP	40	2
	PPHLN1	40	5								LOC728392	41	5
	MIER3	41	6								TMPPE	42	5
	C7orf55-LUC7L2	42	5								RIMBP3	43	4
	ZNF564	43	4								OR51F2	44	5
	MSRB1	45	4								SFMBT2	45	5
	BBS7	46	6								IL2RG	46	4
	STXBP5	47	6								COL5A3	47	4
	EDNRA	48	4								CRTAP	48	4
	MIDN	49	4								TBC1D12	50	3
	SLC6A5	50	6								AMTN	51	4
	PDGFRL	51	4								CTNNB1	52	5
	ZFP106	52	6								TMEM168	53	3
	SAGE1	53	5								PRB1	54	6
	NT5C1A	54	3								CD99_X	55	6
	RBMY1A1	55	6								SPHKAP	56	3
	GRHL3	56	3								HSPA13	57	3
	ZSCAN9	57	4								THSD7B	58	5
	PCP4L1	58	3								PHLDB2	59	5
	PSMG1	60	2								ZNF486	60	2
	LOC728392	61	5								KCTD19	61	4
	GJB1	62	3								MYO16	62	3
	NAPEPLD	63	4								SLC6A5	63	6
	MMADHC	64	2								ANKRD13C	64	5
	ZDHHC24	66	4								C11orf74	65	3
	PIP4K2A	67	4								C3orf14	66	4
	INPP5D	69	3								OR5AS1	67	5
	TMEM74	70	5								C7orf71	68	4
	IGLON5	71	2								UGT1A1	69	5
	C3orf14	72	4								HHLA3	70	4
	LOC100506388	73	2								MLF2	71	3
	G3BP2	74	5								DCSTAMP	72	4
	ANKH	75	6								SLC18B1	73	3
	DAPK1	76	3								EXOC8	74	6
	HSD3B7	77	5								L1CAM	75	5
	NAP1L2	78	4								STC1	76	4
	MLF2	79	3								EIF4A2	77	4
	CD1C	80	5								NPM3	78	3
	EXOC1	81	6								MAP2K2	80	2
	NR4A3	82	6								IQCJ	81	3
	DUSP6	83	6								PCDHGA1	82	5
	RENBP	84	5								INPP5D	83	3
	MAGEB1	85	5								ATP6AP2	84	5
	CYP2J2	86	6								THYN1	85	5
	IQCJ	87	3								WRAP73	86	6
	POMK	88	6								IFNAR1	87	2
	SNN	89	5								GK2	88	6
	RSAD1	90	3								INTS5	89	3
	B3GALT6	91	3								LOC100130451	91	2
	MST1R	92	4								PHKA2	92	6
	PCOLCE	93	5								MPV17L2	93	2
	OR51F2	94	5								OR10G4	95	4
	SRBD1	95	3								INSIG2	96	3
	MUC16	96	5								SMAD9	97	2
	FAM21A	97	2								EFNB1	98	3
	ZBTB41	98	2								DDX53	99	1
	OR5AS1	99	5								ZIK1	100	4
	HHLA3	100	4								GBP6	101	4
	UTP3	101	2								DDC	102	3
	LRP4	102	4								AQP1	103	5
	HYKK	103	2								ZNF485	104	5
	OR51G2	104	1								MYCL	105	4
	COL4A3BP	105	3								POSTN	106	4
	RND2	106	3								VPS51	107	5
	SFMBT2	107	4								DCAF6	108	5
	HAVCR1	108	6								SYPL2	109	3
	FAM73A	109	4								ACRBP	110	5
	RBP4	110	3								CRB3	111	4
	TAB2	111	6								TRPC7	112	4
	RBAK	112	5								CMTM6	113	2
	TBC1D10B	113	5								C7orf33	115	6
	FAN1	114	4								TRIM39-RPP21	116	2
	OR2H1	115	4								RENBP	118	4
	REP15	116	4								WDR52	119	4
	CDC42EP1	117	6								CREB3L3	120	4
	INSIG1	118	4								OR2H1	121	4
	ALOX15	119	4								RAMP1	122	4
	KLHL23	120	4								PCDH10	123	3
	LDB3	121	2								ZNF564	124	4
	SPAG9	122	3								ZNF281	125	2
	LIMS3	123	5								SUPT20H	126	4
	OR10G4	124	5								GABARAPL2	127	5
	RBBP8NL	125	1								DNAJB11	128	3
	SUPT20H	128	4								SHPK	129	4
	ARHGAP23	129	4								ALOX15	130	3
	TSSC4	130	4								TEX9	131	2
	PCDHB12	131	5								RASGRP3	132	1
	OLFML2A	132	3								MIDN	133	5
	IL1RAP	133	1								RSG1	134	4
	DGKQ	134	5								PKHD1	135	6
	TAS2R19	135	5								SIGLECL1	137	2
	HN1L	136	5								MAGOH	138	3
	ACTN2	137	4								WDR96	139	5
	RAB8B	138	4								TOR1AIP2	140	5
	LMO1	139	5								ZDHHC2	141	5
	CCL20	140	5								OR8D1	142	4
	SNCB	141	5								RBP4	143	3
	TMEM168	142	4								GCNT2	144	4
	KIAA1143	143	5								DGKQ	146	4
	RNASEK	144	6								STARD6	147	4
	THOP1	145	3								MAPK14	148	4
	ERCC6L2	146	4								OR10H1	149	3
	SCN2A	147	4								HECTD1	150	2
	C11orf74	148	3								ZNF737	151	3
	CDKN2A	149	4								TFB1M	152	4
	CPQ	150	4								TAS2R19	153	6
	ABHD16A	151	3								C8orf76	154	6
	ZFAND3	152	3								ABCE1	155	4
	C1QL3	153	6								CCNC	156	3
	PCDHB5	154	4								ARL1	157	3
	LRRC31	155	6								WARS	158	1
	HS2ST1	156	4								CLCN7	159	4
	ALDH3A2	157	6								CRISPLD1	160	3
	C15orf57	158	3								SHC4	161	5
	FCRL2	159	4								TADA1	162	6
	ATP6V1A	161	6								DUSP26	163	2
	TRAPPC2L	163	3								FCRL2	164	4
	CHRDL1	164	4								ELOVL7	165	4
	ALDH4A1	165	6								PDCD1LG2	166	3
	E2F6	166	5								HDAC4	167	4
	CTNNB1	167	4								NCKAP1L	168	1
	ELMOD2	168	4								TPRG1	169	5
	RHPN2	169	4								RHEBL1	170	2
	WARS	170	2								XPC	171	4
	TTLL11	171	3								KIRREL2	172	5
	RFPL3	172	6								G3BP2	173	4
	MBD3L2	173	4								NFKB1	174	5
	PIGK	174	5								CDK8	175	6
	AQP7	175	4								CT45A1	176	5
	ARIH2	176	5								OR51E2	177	6
	OR4K13	177	6								LOC100506688	178	5
	MIER2	179	5								HUS1B	180	4
	STX16	180	5								GPATCH8	181	4
	PACRG	181	4								C15orf57	182	2
	UGT2B11	182	6								HYKK	183	2
	URM1	183	3								RNF219	184	4
	MEGF9	184	4								PRSS36	185	3
	IQGAP1	185	6								ETNK1	186	4
	LYPD2	186	2								LOC728819	187	5
	ARL1	187	3								INSL5	188	5
	CYYR1	189	3								KMO	189	5
	PQLC1	190	5								RANBP6	191	4
	CALCB	191	6								OR52L1	192	3
	RASGRP3	192	1								STARD13	193	6
	ELOVL7	193	6								LIMS3	195	5
	SYPL2	194	4								ARMCX3	196	5
	GBP6	195	4								KCNMA1	197	3
	GOLT1B	196	5								EXOC1	198	6
	DAZ1	197	5								TST	199	4
	HS3ST4	198	4								CCL1	200	4
	RORB	199	5								ARFGAP1	201	4
	VPS51	200	5								SIAH2	202	3
	SLC22A25	201	2								OR52B6	203	5
	HDAC4	202	5								SLC39A9	204	3
	GABARAPL2	203	5								FOXR1	205	4
	WDR52	204	4								ZBTB41	206	2
	WDR73	205	4								CCL20	207	3
	HLA-DQA1	206	3								EFCAB14	208	3
	hsa-let-7d	207	3								IGF2R	209	3
	ECHDC3	208	4								COX7B2	210	3
	CCL14	209	4								KCTD11	211	4
	LOC728819	210	5								RGPD2	212	4
	DHX58	211	2								USF1	213	2
	ST3GAL4	212	5								PCDHB12	215	5
	PSMD8	213	1								NLGN1	216	4
	ZNF347	214	5								RAG1	217	3
	ZNF473	215	3								BZW2	218	5
	ATP6V1G1	216	5								GLUD2	219	6
	SVIL	217	4								IQCD	221	4
	PHACTR4	218	5								PPHLN1	222	5
	TSPY1	219	5								HEXB	223	3
	FBXW12	221	2								TRHR	224	1
	MFSD8	222	5								PIGK	225	5
	TAF4B	223	4								LYZL4	226	4
	PCP4	224	3								TDO2	227	2
	OR12D3	225	3								C7orf62	228	4
	C1orf151-NBL1	226	6								FBXO32	229	2
	C15orf65	227	5								KIF18B	230	5
	TRHR	229	1								CCZ1	231	3
	CCP110	230	3								BFAR	232	4
	CES4A	231	5								PINK1	233	3
	EXOC7	232	5								RBMY1A1	234	6
	GK2	233	5								EPG5	236	6
	UBE2QL1	234	4								IQCF5	237	5
	NDUFA4	235	5								ZNF326	238	5
	PCED1A	236	6								SPANXB1	239	4
	SURF4	237	4								BOD1L1	240	6
	TMPPE	238	6								LYPD2	241	2
	PIDD	239	5								USP17L11	242	6
	ZDHHC2	240	4								ELF3	244	3
	BNC2	241	5								SGCD	245	3
	NRBP2	242	3								ALDH3A2	246	6
	MED25	243	4								SMPDL3A	247	4
	NMI	244	3								C22orf24	248	4
	RTBDN	245	3								PHTF2	249	5
	SPIN4	246	5								POMK	250	6
	ZNF281	247	3								FAM96A	252	5
	BACE1	248	6								C16orf71	253	5
	ME3	249	3								NRBP2	254	3
	ZNF486	250	3								OOEP	255	5
	RBP3	251	6								ALG1L	256	2
	TP53I3	252	4								RNF112	257	4
	NRAP	253	5								SLC22A25	258	2
	SERPINB12	254	6								ERBB4	259	3
	KCNG3	255	5								TMEM88	260	4
	BCOR	256	5								AMMECR1	261	5
	DNAH1	257	4								PYDC1	262	4
	PRR20A	258	6								KLHL23	263	4
	CRIPAK	259	4								ZSCAN9	264	4
	CERS6	260	6								WDR73	265	4
	WBSCR16	261	3								ATP10D	266	4
	SMAD9	262	2								STT3A	267	5
	NEU2	263	6								TMEM65	268	4
	STC1	265	3								LY6D	270	3
	RUNX2	266	5								TAF4B	271	3
	CDK8	267	6								FAM208A	272	4
	GPATCH8	268	4								ASCL2	273	5
	CMC1	269	3								CDCP1	274	5
	EFHC2	270	6								NMUR2	275	3
	CELA3A	271	5								MUM1L1	276	4
	MYH8	272	3								COL4A3BP	277	3
	OR52L1	273	2								MDGA2	278	5
	FOXR1	274	3								NAGK	279	4
	CCHCR1	275	4								TRPM2	280	6
	CD99_X	276	6								CCDC103	281	3
	TACR3	277	3								ATP9B	282	2
	KMO	278	5								PABPC1L	283	4
	RHEBL1	279	2								SNCB	284	4
	PRELID2	280	5								MOCOS	286	3
	L1CAM	281	4								FIGLA	287	2
	BTC	282	3								PDE6G	288	6
	RTN4RL2	283	5								CD52	289	6
	AP3M1	284	4								SLC41A1	290	3
	PANX2	287	6								ADRB1	292	3
	EFNB1	288	3								KLRG1	293	4
	HLX	289	5								RBM12	294	2
	PPM1B	290	4								CA2	295	5
	CCNC	291	3								TAB2	296	6
	MAPK14	292	4								NRAP	297	5
	ICAM4	293	6								B4GALT1	298	5
	C16orf71	294	5								ATP6V0D1	299	5
	C7orf71	295	4								HLA-DQA1	301	3
	RPTN	296	4								FAM109A	302	2
	CCDC138	297	5								HNRNPD	303	4
	RNF26	298	4								ZFAND3	304	3
	CARTPT	299	4								FLI1	305	4
	PRM2	301	3								SLC26A10	306	3
	CXorf23	302	5								SFRP1	307	1
	EPHA5	303	6								CATSPERB	308	4
	VIPR2	304	4								KRTAP9-1	309	3
	KLHDC8A	305	2								RORB	310	5
	INF2	306	3								ALOX5AP	311	4
	OPN5	307	3								TET2	312	3
	DDX43	308	3								ZNF710	314	3
	KIAA1715	309	4								INIP	315	6
	C2	310	4								UNC5C	316	4
	MAP3K14	311	3								GULP1	317	2
	ASB6	312	3								AQP7	318	3
	GLRX	313	6								NR4A3	319	6
	IVL	314	5								CTSB	320	2
	OR4F17	315	5								FAM155A	321	6
	LOC286238	316	5								CAPZA1	322	2
	MKRN3	317	4								RASGRP4	323	5
	SLC10A4	319	4								ZNF544	324	4
	TAS2R60	320	4								CNKSR3	325	4
	SOX7	321	4								ZBTB33	327	3
	TET2	322	3								S100A8	328	3
	PTRHD1	323	4								NMI	329	3
	FAIM2	324	4								NTPCR	330	5
	MMD2	325	5								PCDHA1	331	4
	GAGE1	327	6								ALDH6A1	332	1
	RPH3AL	328	5								ANKRD28	333	4
	PNRC1	329	3								EFHC2	334	6
	ZNF300	330	4								OR1J1	335	4
	METTL1	331	2								NELL1	336	5
	LRRC1	332	4								PIGL	337	4
	SAMD15	333	2								ATIC	338	4
	GARNL3	334	3								IL6R	339	3
	ART3	335	5								BLOC1S5	340	3
	SEC24B	336	4								GOLT1B	341	6
	MFSD4	337	4								NEU2	343	6
	GALNT14	338	2								MPZ	344	2
	GP9	340	5								ICAM4	345	6
	SLITRK1	341	6								ANKRD35	346	5
	OR10G9	342	2								FBXL3	347	2
	NKX6-3	343	3								ALS2CR8	350	4
	MOCOS	344	3								SVIL	351	2
	TM9SF2	345	4								COL11A2	352	6
	CCDC28B	346	6								MED13	353	6
	INSL5	347	3								FZD2	354	3
	CLN3	348	2								HLA-DQA2	355	5
	QRFPR	349	5								TNFRSF10A	356	6
	MUM1L1	350	5								ATXN2L	357	5
	DNMT3L	351	5								C1QL1	358	4
	FAM155A	352	6								IFT52	360	4
	BBS12	353	5								RAB9B	361	3
	CNTNAP3B	354	2								CYP27C1	362	4
	TEKT2	355	6								NCMAP	363	6
	CILP2	356	4								TFF3	364	2
	KRT4	357	3								SLC6A8	365	3
	ZDBF2	359	4								RABAC1	366	3
	SPACA5	360	5								PHACTR4	367	5
	MMGT1	361	3								CCDC15	368	1
	CYP27C1	362	3								KIAA1715	369	4
	PDE6G	363	6								ZNF354B	370	6
	CDCP1	364	6								RASL11B	371	5
	CNNM4	365	3								PRR18	373	5
	KCTD19	366	4								LOC100506388	374	2
	TRPC7	368	4								MNF1	375	2
	MAFG	369	4								CLEC12A	376	5
	PCDHA1	371	4								B3GNT5	378	4
	HESX1	372	3								ZNF136	379	4
	HOPX	375	4								ACYP1	380	3
	TDRKH	376	2								OR52N4	381	4
	EIF4E2	377	6								NKIRAS1	382	3
	H1F0	378	4								DNAH1	383	4
	HLA-DRB1	379	4								TVP23B	384	2
	FGG	380	2								METTL1	386	2
	SESN1	381	3								CCDC109B	387	5
	PRH2	382	5								TCN2	388	4
	HPSE	383	4								LAMA1	389	4
	AMMECR1	384	5								HN1L	390	4
	IL6R	385	4								PLTP	391	2
	LOXL3	386	3								XAGE1A	392	6
	WDR96	387	2								RAB2A	393	4
	UCN3	388	3								PIP4K2B	394	2
	MNF1	389	5								POMGNT2	395	4
	UNC5C	390	5								SNN	396	4
	MLF1IP	391	2								TANK	397	3
	CYB5R1	392	5								B3GALT6	398	4
	DAD1	393	4								TRPM8	399	6
	TEX9	394	3								ZEB1	400	3
	PLA2G12B	395	5								ME3	401	3
	FITM2	396	3								STON2	402	3
	C10orf88	397	5								SPACA5	403	5
	GCNT2	398	3								HYI	404	4
	NSD1	399	6								CCHCR1	405	4
	IBSP	400	6								SAGE1	407	5
	TMEM123	401	6								IL1F10	408	5
	SSX5	402	3								WASF3	409	5
	C4orf46	403	5								BNC2	410	5
	ABLIM1	404	4								LPCAT1	411	5
	TRPS1	407	6								DBF4B	412	5
	EPG5	408	6								SLC24A2	413	3
	NNAT	409	2								PDE8B	414	4
	LOH12CR1	410	3								MAGEA9	415	5
	ACIN1	411	2								TSPY1	416	4
	RWDD2A	412	1								ECHDC3	418	4
	CPED1	413	4								VPS33A	419	3
	MYO16	414	3								CNTNAP3B	420	2
	FAM25A	415	2								ZFP92	421	5
	BOD1L1	416	5								STARD4	422	1
	GPHN	417	3								CA13	423	5
	TMPRSS9	418	3								TRO	424	4
	C2orf91	419	3								TMEM56	425	6
	COX7B2	420	3								LOXL3	426	3
	PTK7	421	3								PTGER3	427	3
	COL9A2	422	5								TPRA1	428	5
	ITGA8	423	2								NHLRC1	429	5
	KLRC4	424	4								VIPR2	430	4
	TP53	425	4								EMC2	431	3
	PURG	426	5								CUL4A	432	4
	TRMT2A	427	4								FGGY	433	3
	ANKRD13C	428	5								OLR1	434	5
	CCDC15	429	3								MRGPRF	435	5
	CCDC140	430	5								C16orf80	436	4
	NTPCR	431	5								GLOD5	437	4
	HSPA13	432	4								KRTAP1-4	438	2
	JOSD2	433	3								USP32	439	3
	PDCD1LG2	434	3								GHR	441	3
	ACYP1	435	4								GALNT5	442	4
	FTHL17	436	4								SERPINB5	443	2
	PDE8B	437	4								NLRP3	444	1
	DGKB	438	4								MEGF9	445	4
	UCP2	439	2								NUDT10	446	5
	SHC4	440	5								FGF10	447	3
	DDO	441	4								RSAD1	448	3
	CDK5RAP1	442	4								NEDD4L	449	5
	SNX9	443	5								CMTM8	450	4
	HPGD	444	4								NAP1L2	451	3
	PRSS36	445	4								EXTL3	452	5
	IL17REL	446	5								C2orf78	453	5
	GJB3	447	5								PGS1	454	1
	DENND2D	448	6								LOH12CR1	455	3
	NELL1	449	5								LARP4	456	2
	NCKAP1L	452	1								OR14J1	457	4
	LHFPL2	453	5								NAV2	458	2
	SLC6A8	454	4								ACTL6B	459	5
	GAD2	455	4								SEPP1	460	3
	C8orf4	456	2								UHRF1BP1L	462	5
	JUP	457	4								GOLPH3	463	4
	A2ML1	458	4								ZNF160	464	5
	CDCA7L	459	4								UBTD2	465	3
	WFIKKN1	460	4								HLA-DQB1	466	3
	NRK	461	6								KLHL12	467	5
	PPFIBP2	462	4								APPL2	470	3
	C8orf76	463	6								MYH8	471	2
	LIX1	464	3								FAT1	473	3
	PRKD2	465	3								ARHGAP31	474	3
	CREB3L3	466	4								SLC44A4	476	2
	MAGOH	467	3								ARID1B	477	2
	DNAH9	468	3								HELZ2	478	3
	PAGR1	469	4								TCAP	479	4
	WLS	470	3								SEMA4C	480	2
	CDH1	471	1								USP38	481	2
	RAB9B	472	4								KCNG3	482	4
	LPCAT1	473	5								POMC	484	5
	B3GALNT2	475	2								SOGA3	485	2
	FAM46D	476	5								ZNF652	486	3
	MYO10	477	5								OR5B21	487	4
	RGP1	478	5								MIER2	488	5
	TMEM145	479	4								URM1	489	2
	TGIF2LY	480	3								LYRM7	490	4
	UAP1L1	481	5								PRPH2	491	2
	IMMP2L	482	5								IRF6	492	4
	CSF2RA_X	483	4								ZNF347	494	4
	KRT78	484	4								PTGDR2	495	4
	CAPSL	485	2								G6PC	496	2
	SLC16A14	486	6								FBXL12	497	3
	TSC22D4	487	3								PRR20A	498	4
	C11orf73	488	4								STX16	499	5
	ATP10D	489	4								LNX1	501	2
	CCDC179	490	2								IVL	502	4
	SNX13	491	6								FBXW12	503	2
	COG1	492	4								EDEM2	504	3
	RASL11B	493	5								THAP3	506	4
	MAP2K2	494	2								PRMT5	507	3
	AVPR2	495	4								OXCT2	509	4
	SULT2B1	496	4								CACUL1	510	2
	ZNF160	497	4								PRAMEF10	511	4
	PRKG1	498	6								SNX13	512	5
	CELA2B	499	5								OPN5	513	3
	PMAIP1	500	4								SIPA1	514	2
	CORO2A	501	4								MAP3K7	515	5
	C10orf91	502	5								APOA2	516	5
	SIAH2	503	3								ZNF280D	517	4
	COG5	504	5								C10orf91	518	5
	LGSN	505	5								LOC100144595	519	3
	ZNF737	507	4								CPQ	520	4
	RGPD2	508	2								THOP1	521	3
	GLUD2	509	6								BMI1	522	5
	CMTM8	510	5								TSPAN31	523	4
	PHTF2	511	5								DDX28	524	2
	WDR61	512	2								MTTP	525	2
	TMEM164	513	6								FADS3	526	2
	ZCCHC3	514	5								ITPA	527	4
	TTC18	515	4								SOCS7	528	3
	GCOM1	516	4								HDAC7	529	5
	TRIM17	517	4								SPIN2A	530	4
	C11orf30	518	2								DNAJB9	531	4
	RNF144A	519	4								ACE2	532	5
	PHF6	520	3								RHPN2	533	4
	SPON2	521	3								KIAA1522	534	3
	HTR1E	522	3								hsa-let-7a-3	535	3
	QRICH2	523	3								C2orf91	536	3
	ITPA	525	5								CDY2A	537	4
	C5orf64	526	4								PDCD1	538	2
	SPANXN4	527	2								SLC26A4	539	5
	BRINP3	528	6								SOX7	540	4
	ALDH6A1	529	1								SERPINA1	542	2
	C5orf47	530	2								KRTAP6-3	543	3
	BMI1	531	5								DOLPP1	544	4
	MT1G	532	3								RUFY1	545	1
	TAF6	533	2								PEX1	546	4
	SMKR1	534	4								PISD	547	1
	DRD2	535	5								FSCN1	548	5
	PALLD	536	4								PIP4K2A	549	3
	ARID3C	537	5								PLXNA3	550	4
	METRN	538	4								INSIG1	551	4
	LRPPRC	539	4								IL17REL	552	5
	MUS81	540	2								KATNBL1	553	2
	SYNJ2BP	541	3								ME2	554	4
	OR51E2	542	6								B4GALT4	555	4
	GKN1	543	5								WFIKKN1	556	4
	C2orf27B	544	2								PNRC1	557	3
	RMI2	545	4								CRIPAK	558	4
	OR51A2	546	5								HS2ST1	559	3
	RARRES1	547	3								PHYH	561	3
	S100A5	548	3								SRBD1	562	3
	CLEC12A	549	4								MED25	563	4
	HECTD1	550	2								USP13	564	4
	AP4M1	552	3								ERV3-1	565	5
	PPP1R42	553	6								HOPX	566	4
	BRWD1	554	5								MLF1IP	567	1
	MBLAC2	556	2								SYNDIG1L	568	5
	GZMA	557	5								DEFB105A	569	4
	ADARB1	558	5								PDGFD	570	4
	TERF2IP	560	6								CELA3A	571	4
	OR8S1	561	4								IL36G	572	4
	ZCCHC24	562	2								DARC	573	2
	TYR	563	5								CIB4	575	4
	F7	564	6								SPSB4	576	4
	INSIG2	565	4								XKR6	577	5
	CCNO	566	6								RAB31	578	3
	VSIG1	567	5								AP1M1	579	2
	KIAA0319L	568	3								KIDINS220	580	5
	UNC119B	569	6								PAK2	581	5
	NUP37	570	4								MPHOSPH8	582	3
	DDX53	573	2								MT1G	583	3
	C19orf53	574	3								BACE1	584	4
	XKRY	575	6								EMC6	585	4
	IDS	576	3								DCAF12	586	2
	MTL5	577	5								OR12D3	587	3
	MYEF2	578	2								OR13C8	588	4
	HLA-G	579	5								KCNJ5	589	5
	ARL6IP5	580	6								FLT1	590	5
	KRTAP12-1	582	1								EVI5	591	3
	CYTH4	583	5								CCL2	592	5
	P2RY8_X	584	5								GYG1	593	5
	ALS2CR8	585	4								MN1	594	4
	FAM83B	586	6								COPE	595	1
	SETD5	587	3								TMIE	596	2
	ZBTB33	588	2								HSD3B7	597	5
	RNF219	589	4								LENG9	598	4
	FAM71F1	590	2								MEDAG	599	4
	TMEM105	591	3								CYTH2	600	5
	NHLRC1	592	5								ZNF177	601	2
	FAM5C	594	3								CDCA7L	602	4
	CFHR5	595	2								NKD1	603	3
	LYZL4	596	5								GAD2	604	5
	SLC25A17	597	3								ACOT11	605	5
	LAMA1	598	3								UBE2QL1	606	5
	EPGN	599	6								EFCAB13	607	4
	VASH2	600	3								TMEM256	608	2
	ZNF326	602	5								DGKB	609	3
	P4HTM	603	3								KIAA1143	610	4
	XKR6	604	5								PTS	611	5
	SNX20	605	5								IL20RB	612	4
	NUDT11	606	3								CXorf23	613	4
	TPRG1	607	5								LRP4	614	4
	KCTD11	608	4								CHD1	615	4
	PCDHGB5	609	3								CTLA4	616	2
	OR56B4	610	3								SCUBE2	617	3
	C14orf39	611	6								CT45A2	618	1
	C2CD4D	612	4								C3orf36	619	2
	ZNF474	613	5								DAPK1	620	3
	USP28	614	3								SLCO1C1	621	5
	APOA4	615	6								C3orf52	622	3
	PRR23B	616	5								CES4A	623	5
	CRYL1	617	6								SPIN4	624	5
	ZNF652	618	3								SHC3	625	4
	RASIP1	619	4								PAGR1	626	4
	TAS2R20	620	4								TNMD	627	3
	TSPAN13	621	3								TRAPPC2L	628	3
	PEX10	622	2								PRM2	629	3
	C7orf62	623	4								LOC100996485	631	3
	LRPAP1	625	4								SCYL2	632	3
	CCZ1	626	3								BRWD1	633	5
	ANKRD66	627	5								SUN3	634	3
	S1PR4	628	4								CAPN15	635	4
	ITLN1	629	5								ORC4	636	2
	CCL1	630	4								TAF1L	637	3
	SMTN	631	3								LMNA	638	4
	SCN10A	632	3								MMD2	639	5
	NMNAT3	633	5								ACVR2B	640	4
	DNAJC5G	635	2								RND2	641	3
	CASC4	636	3								EFEMP2	642	4
	FBXL12	637	3								OR1F1	643	4
	S100A8	638	3								GALNT10	644	3
	DIRAS1	640	4								DYTN	645	2
	PPFIA1	641	3								CCL26	646	3
	RNPC3	643	2								PACSIN3	647	1
	PPP3R1	644	2								PDF	648	2
	CCDC181	645	3								ARIH2	649	5
	THSD7B	646	5								KCNMB2	650	5
	CRHR2	647	5								MEP1B	651	1
	OR8D1	648	5								FGD1	652	5
	CLRN2	649	5								PODXL2	653	5
	CUX1	650	4								OSMR	654	5
	OR7G2	651	4								PRKD2	655	3
	KDELC2	652	5								IMMP2L	656	5
	DDC	653	2								FBLN1	657	4
	OXSR1	655	5								IL1RAP	658	1
	FGF19	656	3								C1orf64	659	3
	COL5A2	658	5								OR10K2	661	5
	TCEA3	660	5								PON2	662	4
	ARL8A	661	3								BFSP2	663	5
	OR8I2	662	3								MOCS3	664	3
	NPY5R	663	5								CBLB	665	3
	CTLA4	664	2								BRDT	666	4
	SERPINI2	665	4								GPAA1	667	5
	MOCS3	667	3								NKG7	668	4
	ZNF395	668	3								CRKL	669	3
	ETV3	669	5								RAB6B	670	2
	GAS6	670	4								C19orf53	671	3
	SGMS1	671	5								USP39	672	5
	ZBTB38	672	5								CDC42EP1	673	5
	C11orf68	673	5								CLASP2	674	2
	PCDHB8	674	3								DNAJC18	675	3
	OSBPL11	675	3								GREB1L	676	4
	ZAR1L	676	5								SHOX_X	677	3
	XAGE1A	677	4								SLC22A16	678	5
	DVL1	678	5								GALNT15	679	4
	GPR161	679	5								RTN3	680	3
	ACAD10	680	5								PTRH1	681	3
	SIGLECL1	681	2								PCOLCE	682	5
	FBXW2	682	5								CNST	683	5
	ADCY4	683	3								ZNF720	684	4
	OCIAD1	684	5								SLFN5	685	3
	YTHDF3	685	5								SPANXA1	686	5
	NOC2L	686	4								DEFB119	688	5
	KIAA2022	688	4								CASP1	689	3
	C22orf24	689	4								SERPINI2	690	5
	COL16A1	690	5								ADAM12	691	3
	FAM96A	691	5								ZNF708	692	5
	LDLRAD1	692	3								SCN4A	693	3
	C18orf32	693	4								MAPKAPK2	694	4
	INTU	694	4								RCL1	695	3
	LCN8	695	2								MUC7	698	4
	ZNF600	696	5								DAZ1	699	5
	ZNF431	697	5								IGSF10	700	3
	TAB3	698	5								TMOD3	701	5
	GPR25	699	5								KHDRBS1	702	3
	IFNA2	700	5								TAF7L	704	2
	SCGB3A2	701	5								APBA3	705	4
	EFCAB14	702	5								ZNF732	706	1
	LIPH	703	3								ZNF716	707	4
	ZNF708	704	5								NUP37	708	4
	MBD1	705	4								PSG6	709	3
	FAM160B2	706	4								ADD3	710	4
	WDR90	707	4								IGLON5	711	2
	PORCN	708	5								ITGB6	712	4
	FKBP15	709	4								FTHL17	713	4
	DNAJB9	710	4								HBZ	714	2
	C17orf74	711	3								PRRG3	715	5
	H2BFM	712	2								TBC1D10B	716	5
	TRPC4AP	713	5								DR1	717	2
	SPANXB1	714	3								TRMT2A	718	4
	BZW2	715	5								LGI1	719	4
	RNF112	716	4								CLPSL1	721	3
	RBPJ	717	3								MAT2B	722	3
	SIRT7	719	4								HTR3A	723	2
	C17orf78	720	4								TTC18	724	4
	PUM1	721	3								WSB1	725	5
	OR52I1	722	4								ZNF2	726	3
	SCRN1	724	1								POLA2	727	2
	ABCA8	725	5								DAD1	728	2
	DCAF8L2	726	5								LDB3	729	2
	MAP3K7	727	5								TRAT1	730	2
	RYBP	728	3								SAMD15	731	3
	APITD1	729	5								GKN1	732	5
	DMRTC1	730	4								SNX17	733	4
	ARAP1	731	5								LOC286238	734	4
	GET4	732	4								SLC15A1	735	5
	MYO5C	733	4								KLRB1	736	2
	TSPYL5	734	5								N6AMT1	737	2
	VPS33A	735	4								SPATA9	738	4
	IPCEF1	737	4								KLF4	739	2
	PPBP	738	5								LMAN2	742	4
	C1QL1	739	4								TNFAIP8	743	5
	EPCAM	740	4								GRXCR2	744	4
	IFFO2	741	2								HESX1	745	3
	ABCA5	742	4								ARL8A	746	3
	ITSN1	743	5								LRPAP1	747	5
	MSANTD3	744	5								MKRN3	748	5
	RIMBP3	745	3								IFFO2	749	2
	FSCN1	746	5								SYCP2	750	4
	GPR180	747	4								AFTPH	751	5
	TMEM233	748	3								GLRX	752	5
	AFTPH	749	4								C9orf37	754	5
	ME2	751	4								CD109	755	4
	TMEM256	752	3								TMEM215	756	4
	MUC12	753	4								TRIM17	757	3
	ACTA1	756	5								CACNG6	758	4
	P2RY6	757	1								ZNF79	759	3
	CNBP	758	4								HPSE	760	4
	ZNF732	759	1								ITPRIPL2	761	3
	TMIE	760	4								AKAP2	762	2
	ZFP92	761	5								ZNF629	764	3
	USP33	762	4								SAA2	765	3
	CRISPLD1	763	5								RHBDL2	766	2
	PCBP4	764	5								SNX19	767	4
	BPTF	766	1								RETNLB	768	5
	ZEB1	767	3								NDUFS4	769	3
	FLT1	768	5								FAM60A	770	3
	YAF2	770	1								GRHL3	771	2
	GPALPP1	772	5								EXD1	772	3
	LY6D	774	4								PEX14	773	2
	TMEM56	775	5								SLC11A2	774	4
	MDGA2	776	5								SLC17A8	775	5
	HYOU1	777	3								HAGH	777	3
	PMFBP1	778	3								CLRN2	778	4
	PHLDB2	779	5								DXO	779	2
	SERPINB5	780	3								LTK	781	1
	DDR1	781	4								HCAR1	782	5
	TCEB3	782	2								KCTD14	784	4
	BMPR2	783	3								USP33	785	3
	MRGPRF	784	4								COMMD4	786	3
	ACE2	785	4								PORCN	787	5
	CCL2	787	5								INF2	789	3
	FAM107B	788	4								KRTAP9-7	790	3
	TCL1A	789	4								RAB8A	791	3
	TMEM65	790	4								SPRR2D	792	2
	SERF1A	791	3								STAC3	793	2
	AMTN	792	4								ZNF670	794	4
	SLC12A8	793	3								TCF7L2	795	3
	DENND5B	795	5								ERLIN1	796	4
	CLDN12	796	4								PCBP3	797	4
	HTR3B	797	3								AADAT	798	4
	RGPD3	798	1								SCN2A	800	4
	XKR4	799	4								SPINK13	801	4
	USP29	800	3								ZNF331	802	3
	NFKB1	801	5								GET4	803	4
	CLCA4	803	2								C7orf55-LUC7L2	804	5
	MYCL	804	3								PENK	805	2
	RUNX3	806	4								HTR1D	806	2
	KIF3C	807	4								CAPSL	807	2
	SMDT1	809	2								TAS2R10	808	5
	TFB1M	810	4								RAB10	809	4
	TMOD3	811	5								OR8S1	810	4
	MTTP	812	2								SPPL3	811	4
	VSIG8	813	5								CYB5R1	812	3
	CCDC81	814	4								FGF19	813	3
	PRY	816	5								PTRHD1	814	5
	SP8	817	4								NOD1	815	5
	SPHKAP	818	2								ARHGAP22	816	3
	ETNK1	819	5								KCNJ3	817	4
	KCNJ3	820	5								ANKH	818	5
	ITPRIPL2	822	4								LOC256021	819	3
	SERPINA1	824	4								C6orf7	820	4
	SAMD13	825	3								CCDC181	821	3
	TLE2	826	3								OTC	822	3
	GABRP	827	2								PNMA6A	823	4
	EFHC1	829	4								DNAJC9	824	4
	SLC20A1	830	4								TSTD2	825	5
	ZNF331	831	3								NAPEPLD	826	4
	SLC6A7	832	3								ARHGAP15	827	5
	GPR151	833	5								MBLAC1	828	5
	C4orf19	834	5								VAMP5	830	4
	SLC18A2	835	4								METAP2	831	1
	SPEG	836	3								IFNA7	832	1
	MCHR1	837	3								TRMT44	833	5
	SLC11A2	838	4								HPGD	834	4
	C2orf61	839	3								CNIH1	835	3
	ABCE1	840	4								ZDHHC24	836	3
	SYT11	842	3								TMEM86B	837	5
	MS4A7	843	5								ETFDH	839	5
	BCAS4	844	2								P2RX4	840	4
	INTS5	846	3								RBM7	841	3
	ANKRD18A	847	2								WEE2	842	4
	KBTBD12	848	3								LOC100130301	843	5
	OXGR1	849	4								SPHK1	844	3
	HLA-C	850	2								TMEM219	845	2
	STAU2	851	5								GJD4	846	2
	S1PR2	852	4								AKR1C4	847	1
	RNF41	853	3								PQLC3	848	3
	ANGPTL3	854	4								RIMS2	849	4
	PAK6	855	4								GIF	850	4
	RTCB	856	2								F2RL2	851	2
	MOGAT3	857	4								SPPL2C	852	3
	AP1M2	858	4								ARFIP1	853	4
	KCNC4	859	5								NUDT15	854	4
	TMEM167B	862	4								IFFO1	855	2
	FABP6	863	4								C8orf44-SGK3	856	4
	PLCXD2	864	4								TAS2R13	857	4
	TXNRD2	865	4								C10orf88	858	4
	PRSS58	866	2								RASL11A	859	2
	XPR1	867	3								ERI1	860	2
	HBS1L	869	4								MUC12	861	3
	SCN9A	870	4								SLC47A2	862	5
	PDLIM4	871	3								DLX1	863	4
	LOC339862	872	4								HIST1H1B	864	2
	OR8B8	873	3								PIGU	865	4
	COG4	874	4								OR10K1	867	5
	THYN1	875	5								OR6P1	868	5
	NKIRAS1	876	5								CPEB2	869	4
	INPP5J	877	4								MRPS7	870	1
	MUC6	878	4								LETM2	871	4
	CLCN7	879	4								C17orf50	872	2
	EIF4A2	880	4								GLTSCR1L	874	4
	REG3A	881	3								TMEM232	875	3
	SUPT20HL2	882	5								SMG1	876	1
	TXNDC11	883	2								KRTAP19-2	877	1
	TEX37	884	4								CPS1	878	4
	BMPR1B	886	5								PAIP2	879	4
	MX2	887	4								ARHGEF38	880	3
	MYO1D	888	5								PALLD	882	4
	KBTBD13	889	2								PTPRZ1	883	5
	LOC643669	890	5								TOB1	884	4
	OR6X1	891	5								OR5K1	885	5
	SHB	893	4								CABP1	886	1
	DCSTAMP	894	4								ZNF236	890	5
	YBX2	896	5								QRICH2	891	3
	RAG1	897	3								SPNS2	893	5
	C8orf44-SGK3	898	4								OR51T1	895	3
	ADCYAP1R1	899	5								LIX1	896	3
	HTR3A	900	2								CDK7	897	4
	CYP11A1	901	1								U2AF1L4	898	2
	ROBO1	903	4								COG5	899	5
	HLA-E	904	4								ACAD10	901	4
	C1orf54	905	5								APITD1	902	5
	BDNF	906	4								SGK3	903	4
	TCF24	908	3								ZMYM6NB	904	4
	PIGL	909	5								BTBD10	905	4
	CSGALNACT2	910	4								FAM175B	906	3
	ZNF423	911	3								CARD18	907	5
	PAQR7	912	5								ACTN2	908	4
	IGFBP5	913	5								APOBEC3A_B	909	2
	KCTD14	914	5								C18orf32	910	4
	STK39	916	5								HFE	911	3
	LOC100130370	917	3								GUCY2F	913	2
	BRS3	918	4								FAM212A	914	3
	CNKSR1	920	3								SRY	915	4
	CLINT1	921	3								UCN3	918	4
	IFITM10	922	4								MMGT1	919	2
	ZNF467	923	4								TAP1	920	4
	ARG2	924	4								RCSD1	921	2
	OR51T1	925	5								MICAL3	922	3
	SLC22A16	927	4								DUSP6	923	5
	PDK3	928	3								KIAA1549	924	3
	OR6C3	929	3								CD81	925	4
	ZNF2	930	2								CD4	926	3
	PIGU	931	4								DCDC2	927	3
	SLMO1	932	1								C2orf49	928	1
	GLTSCR1L	933	4								PPP1R42	929	5
	DNAJB11	934	3								BEND3	930	4
	GPR37	935	3								TMEM81	931	3
	SLC10A6	937	4								KIR3DL2	932	3
	TTC7B	938	4								PGF	933	5
	CYFIP1	939	5								ALDH3B2	934	4
	POU3F3	940	3								CRNN	935	2
	SMYD4	942	4								RAB8B	936	5
	DCAF6	943	5								SRPK1	937	4
	ZIK1	944	5								ARSE	938	2
	WFDC5	945	3								FNTA	939	3
	BTBD10	946	4								OLFML2A	941	2
	SLC38A7	947	4								DDX25	942	2
	MACF1	948	5								OR5J2	943	4
	ZFYVE19	949	3								NRN1L	944	2
	MGP	950	5								SESN1	945	3
	SWSAP1	951	1								BTLA	946	3
	WEE2	952	4								EBF3	947	3
	NCOA5	953	5								ANKRD18A	948	2
	GLOD5	954	4								NCS1	949	3
	STX10	956	4								CP	950	3
	PTN	957	2								KIAA1671	952	3
	PIP4K2B	958	2								PRKG1	953	5
	BOD1	959	3								APOE	954	4
	L3HYPDH	960	3								EIF4B	955	2
	ZSCAN16	961	5								COX8C	956	4
	FGF18	962	3								FKBP1B	957	3
	RGL2	963	2								C17orf78	958	4
	CCDC176	964	5								PRKAB2	959	3
	ACOT9	965	5								SLC6A2	961	4
	TBC1D12	966	3								SLC38A7	962	4
	RCL1	967	4								GPC3	963	4
	CYLC1	969	1								COL4A6	965	3
	CARD18	970	4								PDK4	966	3
	SLFN5	971	3								RBM48	967	4
	CREG1	972	5								HYOU1	968	3
	TMEM174	973	4								PIDD	969	4
	C10orf67	974	4								LOC100653515	970	3
	ASCL2	975	4								VSIG1	971	5
	KRT80	976	2								UMPS	972	3
	POLR2A	977	2								LRRFIP2	973	3
	ANLN	978	4								SELM	974	1
	SUOX	979	3								PAPSS1	975	4
	SHPK	980	5								TSC22D4	976	4
	CCR6	981	3								MORC4	978	2
	POGLUT1	982	2								ITCH	979	4
	IRF6	983	5								SNX20	980	5
	PSG6	985	4								PTH1R	981	2
	ACO1	986	4								KRT39	982	5
	UBE2Z	988	4								MAP3K9	983	4
	ZNF443	989	5								TAS2R20	985	4
	SFXN2	990	2								HLA-DOB	986	5
	IQCK	991	3								IFITM10	988	4
	KSR2	992	4								PSMA1	989	3
	RGL3	993	5								C9orf123	991	2
	CD53	994	2								TAS2R60	972	3
	OR5B21	995	4
	ZNF710	996	4
	BAGE2	997	5
	NUDT10	998	5
	ZNF225	999	2
	ROR2	1000	5
	GRK4	1001	4
	SGMS2	1002	5
	ACRC	1003	4
	ALG1L	1005	2
	KANK1	1006	4
	MTSS1	1007	3
	HMHB1	1008	3
	RAMP1	1009	4
	CD55	1010	5
	CLPSL1	1011	4
	PCGF6	1012	4
	RBM48	1013	4
	EPT1	1014	4
	TBC1D10A	1015	4
	PSMD13	1016	4
	GPC2	1017	4
	BCMO1	1018	4
	CFHR4	1019	5
	OR9G1	1020	5
	PTGDR2	1021	4
	PRRX2	1023	2
	DUSP26	1024	2
	CERKL	1025	4
	SFRP1	1026	2
	WSB1	1027	5
	BEND3	1028	4
	SIPA1	1029	2
	LIN37	1030	3
	MRPS7	1031	1
	SPNS2	1032	5
	C6orf141	1033	2
	BRICD5	1034	4
	MAT2B	1035	3
	FIBIN	1037	5
	EMR2	1038	5
	OR9G4	1039	5
	FAM9A	1040	5
	IGSF5	1041	5
	DSC2	1044	4
	PHIP	1045	2
	MAGED4	1046	5
